# Supplementary material for: In vivo PDX CRISPR/Cas9 screens reveal mutual therapeutic targets to overcome heterogeneous acquired chemo-resistance
Source: PubMed Central journal article supplement (PMC9712105; doi:10.1038/s41375-022-01726-7), 2022-11-04
Supplement: 41375_2022_1726_MOESM1_ESM.pdf [file 41375_2022_1726_MOESM1_ESM.pdf]

## Supplemental Information

for

### **In vivo PDX CRISPR/Cas9 screens reveal mutual therapeutic targets to overcome heterogeneous acquired chemo-resistance**

Anna-Katharina Wirth<sup>1</sup>, Lucas Wange<sup>2</sup>, Sebastian Vosberg<sup>3</sup>, Kai-Oliver Henrich<sup>4,5</sup>,  
Christian Rausch<sup>6</sup>, Erbey Özdemir<sup>1</sup>, Christina M. Zeller<sup>1</sup>, Daniel Richter<sup>2</sup>, Tobias  
Feuchtinger<sup>7</sup>, Markus Kaller<sup>8</sup>, Heiko Hermeking<sup>8</sup>, Phillip A Greif<sup>6,9</sup>, Daniela Senft<sup>1</sup>,  
Vindi Jurinovic<sup>1,6</sup>, Ehsan Bahrami<sup>1</sup>, Ashok Kumar Jayavelu<sup>10,11</sup>, Frank  
Westermann<sup>4,5</sup>, Matthias Mann<sup>10</sup>, Wolfgang Enard<sup>2</sup>, Tobias Herold<sup>1,6</sup>, Irmela  
Jeremias<sup>1,7,9,☆</sup>

This pdf contains

Supplemental Methods and References

Supplemental Tables

Supplemental Figures and Legends

## Supplemental Methods

### Establishment and serial transplantation of transgenic patient derived xenograft (PDX) models

Eight to 16 weeks old male and female NOD.Cg-*Prkdc<sup>scid</sup> Il2rg<sup>tm1Wjl</sup>*/SzJ (NSG) mice (The Jackson Laboratory, Bar Harbour, ME, USA) were kept in individually ventilated cages (IVCs). The animal rooms were fully air-conditioned with a temperature of 20-24°C and 45-65% humidity according to Annex A of the European Convention 2007/526 EC. The maximum stocking density of the cages corresponds to Annex III of the 2010/63 EU. The cages were constantly filled with structural enrichment and the animals had unlimited access to food and water. The animals were inspected daily and scored weekly. Signs of monitoring were a body condition score (BCS), posture and movement, behavior, condition of care, eyes and breathing. Humane endpoints were a BCS of <1, marked lameness or inability to move. Animals with apathetic behavior and no reaction to external stimuli, as well as swollen eyes or swollen peritoneal area and gasping also lead to a termination. In therapy trials, loss of body weight beyond 15% for more than two days or beyond 20% relative to day of treatment start resulted in termination. Establishing serially transplantable ALL PDX models in NSG mice from patient material, re-isolating PDX cells from murine spleen and bone marrow (BM), PDX cell culture, lentiviral transduction, enrichment of transgenic cells and *in vivo* bioluminescence imaging (BLI) were performed as described previously (1-5). In brief, up to  $1 \times 10^7$  fresh or thawed transgenic PDX ALL cells were injected into the tail vein of mice. To monitor engraftment, tumor growth and treatment response, tumor burden of mice was regularly assessed by IVIS Lumina II (Caliper) with Living Image version 4.4 software (PerkinElmer) starting at day 14 after transplantation and additionally, 50µl peripheral blood (PB) was repetitively collected from the tail vein starting at day 28 after transplantation. PB was analyzed by flow cytometry after staining for murine CD45 and human CD38 (2). At advanced leukemic disease, at defined time-points or at signs of clinical disease (rough fur, hunchback, reduced motility, paralysis) mice were sacrificed by exposure to CO<sub>2</sub> or cervical dislocation and ALL PDX cells were re-isolated from murine BM and/or spleen for further analyses.

## **In vivo treatments**

Mice were treated systemically with vincristine (VCR) i.v. once per week and/or with cyclophosphamide (Cyclo) i.p. once per week and/or with venetoclax (ABT-199, SelleckChem) 100 mg/kg p.o. five times per week. In all combination treatment experiments, VCR was applied two days prior to Cyclo; In combination treatment experiments of all three drugs, venetoclax was applied on days 1-5, VCR on day 3 and Cyclo on day 5 of each treatment week. VCR and Cyclo were diluted in sterile PBS for efficient application, ABT-199 was dissolved in 1% Carboxymethyl cellulose and 5% DMSO. Animals of the control groups were treated with solvent (PBS) by the same route of administration. Drug concentrations were calculated from clinically relevant concentrations converting the human doses to mouse equivalent doses based on body surface area and differences in metabolism as described (2, 6, 7).

Drug dosages of VCR and Cyclo were further optimized for each PDX sample individually to ensure tumor reduction by at least 2 orders of magnitude: parental ALL-199 and mice in the multiplex or pretreatment experiment received 0.15 mg/kg VCR and 70 mg/kg Cyclo; ALL-50 received 0.25 mg/kg VCR and 70 mg/kg Cyclo; ALL-265 received 0.3 mg/kg VCR and 70 mg/kg Cyclo. In the ALL-199 “low dose” treatment course 0.1 mg/kg VCR and 50 mg/kg Cyclo was used, in the short term treatment scheme, mice bearing ALL-199 or ALL-265 received 0.5 mg/kg VCR and 100 mg/kg Cyclo and in the “high dose” treatment scheme, mice received 0.6 mg/kg VCR and 100 mg/kg Cyclo. Mice were closely monitored to prevent signs of treatment toxicity and sacrificed as soon as clinical signs of sickness became apparent (weight loss, rough fur, reduced motility, hunchback).

Criteria to define sensitive, persisting and resistant cells were as follows: *Sensitive*: imaging values in the “descending phase” in repetitive imaging, 2-3 weeks after start of treatment. *Persisting*: imaging values “stable” in repetitive imaging at or below 1% relative to start of treatment. *Resistant*: imaging values in the “ascending phase” in repetitive imaging; values rise by at least 10x compared to tumor burden at the persisting stage, despite continuous treatment.

*Drug holiday experiments*: resistant ALL-199 derivatives were injected into mice (n=1 per derivative) and grown without treatment. At BLI signals  $\geq 1 \times 10^{10}$  p/s, PDX cells were re-isolated from murine BM and up to  $5 \times 10^6$  cells were re-transplanted into next recipient mice. The procedure was repeated twice, resulting in approximately 6 month

of drug holiday. In the fourth passage, cells were injected into two mice per derivative. One mouse was left untreated while the other mouse received chemotherapy, starting at a BLI signal  $\geq 1 \times 10^9$  p/s. Treatment response was analyzed by repetitive BLI.

*Pretreatment experiments:* mice were treated with chemotherapy or with PBS as a control for six weeks, before donor ALL-199 PDX cells were injected. ALL-199 cells were either injected in low numbers (n=5 mice per group) to analyze tumor growth by repetitive BLI and compare growth between pre-treated and untreated mice, or in high cell numbers to achieve a high tumor burden (n=5 mice per group) and initiate treatment with combination chemotherapy; treatment response was monitored by repetitive BLI.

### **Multiplexing PDX**

For the multiplex in vivo experiment, individual PDX samples were selected to i) be suitable for transduction and in vitro cultivation; ii) cover a range of different ALL subtypes (Ph-like, hyperdiploid, TCF3-TBX1, KMT2A-AFF1, DUX4 fusion); iii) cover different stages of disease (initial diagnosis, first and second relapse); and iv) have a similar passaging time in vivo. PDX cells were marked by one or more fluorochromes (eGFP, mCherry, mtagBFP, iRFP or combinations of these) as described (1, 8). Transduced cells were kept in vitro for 3 days, followed by enrichment by FACS. A mix of all samples was injected into two mice to expand the transgenic cell populations. At high leukemic burden, cells were re-isolated from mice and individual populations were enriched by FACS. Fluorochrome expression profiles of each sample were recorded by flow cytometry and samples were mixed again. Resistant PDX ALL-199 cells, which were known to proliferate slower than untreated PDX ALL-199, were injected in a larger proportion (10x) compared to untreated PDX ALL-199. For ALL-50 and ALL-707, fewer cells had to be injected as less cells could be isolated from donor mice. Individual samples were injected in the ratio: 1x ALL-199U, 10x ALL-199R, 0.07x ALL-50, 1x ALL-265, 1x ALL-502, 0,75x ALL-707. Fluorochrome profiles of the mix were recorded as well and cells were injected into groups of mice (n=12). Engraftment was analyzed by repetitive BLI. At BLI signal  $\geq 1 \times 10^9$  p/s, mice were randomly assigned to one of three groups (n=4 per group). One group was sacrificed, PDX cells were re-isolated from murine bone marrow and composition of the PDX population was analyzed by flow cytometry. One group received polychemotherapy for three weeks, one group

received PBS as control. At the end of the experiment, PDX cells were re-isolated from murine bone marrow and fluorochrome expression analyzed to identify individual PDX populations. Relative proportion of the individual PDX sample within the mixture was determined for each PDX sample in each group. Proportion after treatment and in the PBS treated group was normalized to start of treatment.

### **Determination of doubling time of PDX in vivo**

*In vivo* doubling time was calculated by non-linear fitting of an exponential growth curve to data points of repetitive *in vivo* imaging using GraphPad prism. Doubling time was based on two different time points (( $x_1|y_1$ ) and ( $x_2|y_2$ )) and calculated as follows: Doubling time =  $\ln(2)/k$  with  $k = (\ln(y_2) - \ln(y_1)) / (x_2 - x_1)$ .

### **Exome Sequencing and data analysis**

DNA isolation and exome sequencing was performed at LaFuGa (Gene Center, LMU Munich). Murine bone marrow containing PDX-ALL cells was thawed and human cells were enriched. gDNA and library preparation was performed using QIAmp DNA Blood Mini Kit (Qiagen, Düren, Germany) and quantification by Nanodrop and Qubit dsDNA HS Assay Kit. Exome libraries were prepared and multiplexed using SureSelect Human All Exon V6 kit. Sequencing was performed using Illumina HiSeq 1500 and NextSeq 2000 systems with 100 bp or 150 bp paired-end reads. For data analysis and quality assessment, sequencing reads with original length of 150bp were trimmed to a length of 100bp at the 5' end to ensure consistent mapping. All sequences were trimmed based on base calling quality (min 13) at both ends. Sequence reads containing "N" bases and reads with length smaller than 50 nucleotides after trimming were discarded. Reads were mapped to the hg19 reference genome using BWA-aln 0.7.10 with default parameters. Mapped reads were filtered based on mapping quality (min 13) and reads not mapping to annotated protein coding regions were discarded. Reads likely arising from PCR duplicates were removed using samtools rmdup. On average, about 43 million high quality reads per sample were used in the analysis (range 29,575,575 - 58,527,169), resulting in an average target coverage of 80x. Sequencing reads were realigned around insertions and deletions using GATK IndelRealigner. Sequence variants in individual samples were detected using samtools mpileup and VarScan 2.3.7 using a minimum variant allele frequency (VAF) of 20%

with a minimum coverage of 10x and the number of variant supporting reads  $\geq 3$ , and a base calling quality of 20. Low evidence variants found in donor sample were subtracted to call variants gained in all other samples. Low evidence variants in donor sample were called using reduced cutoffs: VAF  $\geq 5\%$ , coverage  $\geq 1x$ , number of variant supporting reads  $\geq 1$ , base calling quality  $\geq 6$ . The translational effect of sequence variants was annotated using SnpEff 4.3 and the Ensembl GRCh37.75 annotation. Copy number alterations were detected using GATK DepthOfCoverage and OptimalCaptureSegmentation as previously described (9). The following cutoffs were applied: mean exon coverage  $\geq 10x$ , number of exons per segment  $\geq 2$ , size of segments  $\geq 100kb$ , and number of segments per chromosome  $\leq 10$ . Four samples were excluded from further analyses due to poor sequencing quality (ALL-199 D3, ALL-50 D6, and two ALL-199 untreated control samples). VAF were filtered based on their genomic position and frequency. Mutations in regions of copy number loss were extracted by filtering for the respective genomic regions Protein-coding genes assigned to these genomic regions were extracted using Ensembl Biomart with genome assembly GRCh37.p13 (10).

### **Targeted sequencing of recurrently mutated genes**

To obtain a high sequencing depth of identified *TP53* mutations in ALL-199, an established sequencing panel of 68 recurrently mutated genes was utilized. Experimental procedure and data analysis was performed as previously described (11).

### **Transcriptome sequencing with prime-seq and differential gene expression analysis**

Murine bone marrow containing PDX-ALL was thawed and 2000 human cells were enriched by FACS based on GFP expression. Cells were sorted into 100  $\mu$ L RLT Plus Buffer (Qiagen, Düren, Germany) supplemented with 1 %  $\beta$ -Mercaptoethanol. Samples were flash frozen and stored at  $-80$  °C until further processing. RNA sequencing was performed using prime-seq (12), a bulk version of the single cell RNA-seq method mcSCRB-seq (13). In brief, samples were digested with Proteinase K and nucleic acids were isolated using SPRI Beads and DNaseI digestion was performed on beads. Reverse transcription of the isolated RNA was done using barcoded oligo-dT primers and a template switching oligo. Exonuclease I digestion was performed to

remove excess primers. cDNA was amplified using Kapa HiFi HotStart polymerase and quality was assessed using capillary gel electrophoresis. Library preparation was carried out in triplicates with 0.8 ng cDNA input each using the Nextera XT Kit (Illumina, San Diego, USA). Fragments of 300-900 bp size were selected by agarose gel electrophoresis and library sequencing was performed at LaFuGA (LMU, Munich) with Illumina HiSeq1500 (Illumina, San Diego, USA) with paired-end reads. Sequencing was designed to cover barcode and UMI sequences with 28 bp in the first read and cDNA fragments with 50 bp in the second read and aiming for at least 10 Mio reads per sample. Raw fastq files were processed using the zUMIs pipeline (14). Reads were mapped to a concatenated genome of human and mouse (hg38, mm10) and Ensembl gene models (GRCh38 v.84,GRCm38.85) were used for quantification of gene expression levels. Samples were analyzed in two different batches according to the same protocol with minor modifications. The first batch was carried out using individual amplification of cDNAs, the second batch using pooled amplification for less bias and improved quality. To correct the batch effect resulting from the use of different prime-seq sequencing time points, an empirical Bayesian method or the methodologies implemented in the limma package of R were applied as described previously (15, 16). Normalization of read counts was performed using the voom function (17). Differential gene expression was calculated using the DESeq2 and limma packages in R following recommended workflows (16, 17). Differential gene expression was calculated between resistant and untreated samples and significantly upregulated transcripts in resistant samples were defined with the following cut-offs:  $p < 0.001$  and  $\log_2$  fold-change  $>1$ .

Differential gene expression analysis (t-test) between 1p-deleted (n=15; derivatives D4-D8) vs. 1p non-deleted (n=10, derivatives D1-D2) resistant derivatives and corresponding data visualization were done using the R2: Genomics Analysis and Visualization Platform (<http://r2.amc.nl>). *BCL2* expression in high risk B-precursor ALL samples was analyzed from the R2 deposited dataset "Tumor ALL (B) - Carroll - 98 - MAS5.0 - u133p2" (based on GSE7440) (18).

To test the association between *BCL2* and overall survival, we used the publicly available microarray data set consisting of 449 AML patients treated in different trials of the Haemato-Oncology Foundation for Adults in the Netherlands (HOVON). The data were a part of a publicly available cohort analyzed by Affymetrix (GSE14468) (19, 20).

## Protein expression analysis

Proteome analysis was performed as described previously (21). Murine bone marrow containing PDX ALL was thawed and human cells were enriched by FACS based on GFP expression and washed thoroughly in PBS twice. Cells were lysed in 1% SDC buffer, incubated (15 min, on ice), boiled (5 min, 95 °C), sonicated for 20 cycles and boiled (5 min, 95 °C). Proteins were digested with LysC (1:100 ratio) and Trypsin (1:100 ratio) for 16 hours at 37°C and reaction was stopped using 5:1 2-propanol/1% TFA. Resulting peptides were de-salted on equilibrated styrenedivinylbenzene-reversed phase sulfonated (SDB-RPS) StageTips, washed once in isopropanol/1% TFA and twice with 0.2% TFA, eluted with 60 µl elution buffer (80% ACN, 1.25% NH<sub>4</sub>OH) and dried under vacuum. The dried peptides were resuspended in loading buffer (3%ACN, 0.3% TFA) and subjected to mass spectrometry (MS).

MS analysis was performed using Q Exactive HF-X Hybrid Quadrupole-Orbitrap Mass Spectrometer (Thermo Fisher Scientific, Waltham, USA) coupled to a nanoflow EASY-nLC1000 HPLC (Thermo Fisher Scientific, Waltham, USA). App. 500 ng peptide was loaded onto a 50 cm column with 75 µm diameter, packed in house with 1.9 µm C18 ReproSil particles, and column temperature was maintained at 50 °C (Dr. Maisch, Ammerbuch, Germany). Peptides were separated using a gradient of a two-buffer system of 0.1% formic acid and 60% ACN plus 0.1% formic acid for 140 min at a flow rate of 300 nl/min. The survey scans were acquired at a resolution of 60,000 FWHM at a AGC target of  $3 \times 10^6$  ions (300-1650 m/z, 200 m/z, maximum filling time 20ms), followed by HCD (high energy collisional dissociation) fragmentation of Top15 dynamically chosen ions. The MS/MS scans were detected in the Orbitrap at a resolution of 15,000 FWHM. Data analysis was performed using Maxquant version 1.5.5.2 (22). The MS/MS spectra were searched for tryptic peptides using a target-decoy approach with a reverse database from the reference Uniprot Human (version 2016) proteome and list of potential contaminants by the build in Andromeda search engine. Settings were adjusted as follows: max. of two missed cleavages allowed, minimum peptide length of seven amino acids, Carbamidomethyl of cysteine (C) as fixed modification, oxidized methionine (M), acetylation (protein N-term) as variable modification, false discovery rate of less than 1% at the levels of peptide and protein identification. The proteins were assigned to the same protein groups if two proteins could not be discriminated by unique peptides. The label-free quantification was



performed with the MaxLFQ algorithm (23) requiring a minimum ratio count of two. Match between run feature was enabled for identification of peptide across runs based on mass accuracy and normalized retention times. After filtering of artefacts, such as reverse hits and contaminants, Perseus software was used to analyze Maxquant output tables (24).

### **Gene set enrichment analysis**

Gene set enrichment analysis was performed using GSEA Desktop Application Version 4.2.3. (25, 26). Expression datasets of resistant and untreated PDX ALL-199 cells of transcriptome and proteome analysis were submitted to GSEA using 1000 permutations, Chip platform Human\_ENSEMBL\_Gene\_ID\_MSigDB.v7.5.1 and gene sets Hallmarks (h.all.v7.5.1.symbols.gmt), KEGG (c2.cp.kegg.v7.5.1.symbols.gmt) and GO Terms (c5.go.v7.5.1.symbols.gmt) and analyzed for gene sets enriched in resistant samples.

### **CRISPR/Cas9 dropout screens in ALL PDX samples**

CRISPR-Cas9 dropout screens were performed using a protocol that we had optimized to be performed in vivo in PDX models (27, 28). Cloning of humanized *Streptococcus pyogenes* (hSp) Cas9 into lentiviral vectors was previously described (5). Fluorochrome marker was changed to mCherry using restriction cloning and cutting sites for NotI and Sall. Cloning of sgRNA libraries was performed as previously described (28), except that a H2Kk-mtagBFP marker was used to allow both magnetic enrichment and FACS enrichment. The CLUE pipeline was used to generate a library of 1196 sgRNAs, including sgRNAs targeting candidate genes, non-targeting negative controls and sgRNAs targeting essential genes as positive controls (28-30), Resistant ALL-199 cells were first transduced with the Cas9 construct and cultured for 3 days in vitro before cells were enriched by FACS sorting for mCherry and injected into one mouse per resistant derivative. At high tumor burden, cells were re-isolated from murine bone marrow and percentage of Cas9-positive cells was assessed by flow cytometry. Cas9/mCherry positive cells were enriched by FACS sorting and this procedure was repeated twice to generate a pure population of Cas9-positive PDX cells. Cas9-positive cells were injected into groups of mice (n=5-6) for expansion. At high tumor burden, cells were re-isolated from murine bone marrow and transduced with the sgRNA library, aiming for a maximal transduction efficiency of 30% to achieve

single integrations of sgRNAs. Cells were cultured for 3 days in vitro before transduction efficiency was analyzed by flow cytometry and transduced cells were magnetically enriched using the H2Kk-marker. Cas9- and sgRNA-library double-positive cells were injected into groups of mice, aiming for at least 100x coverage per sgRNA within the homed population, i.e. at least  $2.4 \times 10^6$  cells were injected assuming a homing frequency of 5% with a library size of 1196 sgRNAs. One fraction was used as input control. For the screen using D5, n=11 mice were injected with  $2.4 \times 10^6$  cells per mouse. For the screen using D7, n=11 mice were injected with  $6 \times 10^6$  cells per mouse. At BLI signal  $\geq 1 \times 10^9$  P/s, mice were randomly distributed and either sacrificed (treatment start) or treated with polychemotherapy (treated) or solvent (PBS). After three weeks, cells were re-isolated from murine bone marrow and samples were subjected to NGS as previously described (28). Significant dropouts were identified using the model-based analysis of genome-wide CRISPR/Cas9 knockout (MAGeCK)(31) using the MAGeCK pipeline based on the Galaxy server (32). To analyze the evenness of sgRNA read counts in the library plasmid pool, fraction of sgRNAs was plotted against fraction of total read counts and GINI Index was calculated (33).

### **Barcoding of PDX cells**

Barcodes were cloned and PDX cells transduced as previously described (8). For barcode analysis, gDNA was isolated from the pelleted, flash-frozen ALL PDX cells using the DNeasy Blood and Tissue Kit (Qiagen). When the total cell number exceeded  $5 \times 10^6$  cells, the sample was split into two columns and combined after elution. Based on the fraction of human cells as measured by Flow Cytometry, the total number of human genomes per 5  $\mu$ l of gDNA was calculated and gDNA was concentrated using a SPRI bead clean-up to achieve more than 1000 genomes per sample to ensure comprehensive barcode detection. The Library amplification protocol is based on SiMSen-Seq (34, 35) consisting of a barcoding PCR and an adapter PCR; the first PCR adds unique molecular identifiers (UMI) in a limited number of cycles to ensure uniqueness of the UMI's, the second PCR adds the necessary sequencing adapters and sample indices needed for Illumina sequencing. To ensure recovery of the full barcode complexity in the gDNA, the reaction was performed in triplicates. Due to the low on-target ratios in some samples the barcoding PCR was performed for 6 cycles. Based on the results of a PCR cycling test, samples were amplified for 20 - 28 cycles

to a final concentration between 1 and 5 ng/ $\mu$ L. Each Replicate was indexed with a unique i5 index and an i7 index that was shared between all replicates of a sample. Library quantification was performed using picogreen (Thermo Fisher) and all samples were pooled equimolar. The final library was quantified and correct amplicon size was confirmed using capillary gel electrophoresis (Agilent, Bioanalyzer DNA HS). Barcode sequencing was performed on an Illumina HiSeq 1500 instrument for 110 cycles covering the barcode and UMI sequences. Raw fastq files were demultiplexed using deML (<https://github.com/grenaud/deML>). Barcode assignment and clustering of barcodes to account for sequencing errors and polymerase errors was performed using bartender (36). Clusters with a distance of less than or equal to 4 were collapsed. All further processing and visualisation was performed in R version 3.6. To account for differences in sequencing depth counts were transformed to cpm. Replicates were combined by taking the average cpm value per barcode.

## **Statistics**

All statistical analyses were performed using GraphPad Prism 7.05 or R 3.6.1. Statistical testing between two groups was performed using unpaired t-test. Comparison between more than two groups was calculated with one-way ANOVA followed by Tukey's multiple comparison test. Levels of significance were defined as follows:  $p > 0.05$ : n.s.,  $p \leq 0.05$ : \*,  $p \leq 0.01$ : \*\*,  $p \leq 0.001$ : \*\*\*. Correlation of flow cytometry and bioluminescence *in vivo* imaging signal intensity was calculated using non-linear regression.

## Supplemental References

1. Carlet M, Volse K, Vergalli J, Becker M, Herold T, Arner A, et al. In vivo inducible reverse genetics in patients' tumors to identify individual therapeutic targets. *Nat Commun.* 2021 Sep 27;12(1):5655. Epub 2021/09/29. doi:10.1038/s41467-021-25963-z. Cited in: Pubmed; PMID 34580292.
2. Ebinger S, Ozdemir EZ, Ziegenhain C, Tiedt S, Castro Alves C, Grunert M, et al. Characterization of Rare, Dormant, and Therapy-Resistant Cells in Acute Lymphoblastic Leukemia. *Cancer Cell.* 2016 Dec 12;30(6):849-862. Epub 2016/12/06. doi:10.1016/j.ccell.2016.11.002. Cited in: Pubmed; PMID 27916615.
3. Terziyska N, Castro Alves C, Groiss V, Schneider K, Farkasova K, Ogris M, et al. In vivo imaging enables high resolution preclinical trials on patients' leukemia cells growing in mice. *PLoS One.* 2012;7(12):e52798. eng. Epub 2013/01/10. doi:10.1371/journal.pone.0052798. Cited in: Pubmed; PMID 23300782.
4. Heckl BC, Carlet M, Vick B, Roof C, Alsadeq A, Grunert M, et al. Frequent and reliable engraftment of certain adult primary acute lymphoblastic leukemias in mice. *Leuk Lymphoma.* 2019 Mar;60(3):848-851. eng. Epub 2018/09/21. doi:10.1080/10428194.2018.1509314. Cited in: Pubmed; PMID 30234406.
5. Liu WH, Mrozek-Gorska P, Wirth AK, Herold T, Schwarzkopf L, Pich D, et al. Inducible transgene expression in PDX models in vivo identifies KLF4 as a therapeutic target for B-ALL. *Biomarker research.* 2020;8:46. eng. Epub 2020/09/19. doi:10.1186/s40364-020-00226-z. Cited in: Pubmed; PMID 32944247.
6. Sharma V, McNeill JH. To scale or not to scale: the principles of dose extrapolation. *Br J Pharmacol.* 2009 Jul;157(6):907-21. Epub 2009/06/11. doi:10.1111/j.1476-5381.2009.00267.x. Cited in: Pubmed; PMID 19508398.
7. Nair AB, Jacob S. A simple practice guide for dose conversion between animals and human. *J Basic Clin Pharm.* 2016 Mar;7(2):27-31. Epub 2016/04/09. doi:10.4103/0976-0105.177703. Cited in: Pubmed; PMID 27057123.
8. Zeller C, Richter D, Jurinovic V, Valtierra-Gutiérrez IA, Jayavelu AK, Mann M, et al. Adverse stem cell clones within a single patient's tumor predict clinical outcome in AML patients. *Journal of Hematology & Oncology.* 2022 2022/03/12;15(1):25. doi:10.1186/s13045-022-01232-4.

9. Vosberg S, Herold T, Hartmann L, Neumann M, Opatz S, Metzeler KH, et al. Close correlation of copy number aberrations detected by next-generation sequencing with results from routine cytogenetics in acute myeloid leukemia. *Genes Chromosomes Cancer*. 2016 Jul;55(7):553-67. Epub 2016/03/26. doi:10.1002/gcc.22359. Cited in: Pubmed; PMID 27015608.
10. Yates AD, Achuthan P, Akanni W, Allen J, Allen J, Alvarez-Jarreta J, et al. Ensembl 2020. *Nucleic Acids Res*. 2020 Jan 8;48(D1):D682-D688. Epub 2019/11/07. doi:10.1093/nar/gkz966. Cited in: Pubmed; PMID 31691826.
11. Metzeler KH, Herold T, Rothenberg-Thurley M, Amler S, Sauerland MC, Gorlich D, et al. Spectrum and prognostic relevance of driver gene mutations in acute myeloid leukemia. *Blood*. 2016 Aug 4;128(5):686-98. Epub 2016/06/12. doi:10.1182/blood-2016-01-693879. Cited in: Pubmed; PMID 27288520.
12. Janjic A, Wange LE, Bagnoli JW, Geuder J, Nguyen P, Richter D, et al. Prime-seq, efficient and powerful bulk RNA-sequencing. *bioRxiv*. 2021:2021.09.27.459575. doi:10.1101/2021.09.27.459575.
13. Bagnoli JW, Ziegenhain C, Janjic A, Wange LE, Vieth B, Parekh S, et al. Sensitive and powerful single-cell RNA sequencing using mcSCR-seq. *Nat Commun*. 2018 Jul 26;9(1):2937. Epub 2018/07/28. doi:10.1038/s41467-018-05347-6. Cited in: Pubmed; PMID 30050112.
14. Parekh S, Ziegenhain C, Vieth B, Enard W, Hellmann I. zUMIs - A fast and flexible pipeline to process RNA sequencing data with UMIs. *Gigascience*. 2018 Jun 1;7(6). Epub 2018/05/31. doi:10.1093/gigascience/giy059. Cited in: Pubmed; PMID 29846586.
15. Johnson WE, Li C, Rabinovic A. Adjusting batch effects in microarray expression data using empirical Bayes methods. *Biostatistics*. 2007 Jan;8(1):118-27. Epub 2006/04/25. doi:10.1093/biostatistics/kxj037. Cited in: Pubmed; PMID 16632515.
16. Ritchie ME, Phipson B, Wu D, Hu Y, Law CW, Shi W, et al. limma powers differential expression analyses for RNA-sequencing and microarray studies. *Nucleic Acids Res*. 2015 Apr 20;43(7):e47. Epub 2015/01/22. doi:10.1093/nar/gkv007. Cited in: Pubmed; PMID 25605792.

17. Love MI, Huber W, Anders S. Moderated estimation of fold change and dispersion for RNA-seq data with DESeq2. *Genome Biol.* 2014;15(12):550. Epub 2014/12/18. doi:10.1186/s13059-014-0550-8. Cited in: Pubmed; PMID 25516281.
18. Bhojwani D, Kang H, Menezes RX, Yang W, Sather H, Moskowitz NP, et al. Gene expression signatures predictive of early response and outcome in high-risk childhood acute lymphoblastic leukemia: A Children's Oncology Group Study [corrected]. *J Clin Oncol.* 2008 Sep 20;26(27):4376-84. eng. doi:10.1200/jco.2007.14.4519. Cited in: Pubmed; PMID 18802149.
19. Wouters BJ, Löwenberg B, Erpelinck-Verschueren CAJ, van Putten WLJ, Valk PJM, Delwel R. Double CEBPA mutations, but not single CEBPA mutations, define a subgroup of acute myeloid leukemia with a distinctive gene expression profile that is uniquely associated with a favorable outcome. *Blood.* 2009;113(13):3088-3091. eng. Epub 2009/01/26. doi:10.1182/blood-2008-09-179895. Cited in: Pubmed; PMID 19171880.
20. Taskesen E, Bullinger L, Corbacioglu A, Sanders MA, Erpelinck CA, Wouters BJ, et al. Prognostic impact, concurrent genetic mutations, and gene expression features of AML with CEBPA mutations in a cohort of 1182 cytogenetically normal AML patients: further evidence for CEBPA double mutant AML as a distinctive disease entity. *Blood.* 2011 Feb 24;117(8):2469-75. eng. Epub 20101221. doi:10.1182/blood-2010-09-307280. Cited in: Pubmed; PMID 21177436.
21. Kulak NA, Pichler G, Paron I, Nagaraj N, Mann M. Minimal, encapsulated proteomic-sample processing applied to copy-number estimation in eukaryotic cells. *Nat Methods.* 2014 Mar;11(3):319-24. Epub 2014/02/04. doi:10.1038/nmeth.2834. Cited in: Pubmed; PMID 24487582.
22. Cox J, Mann M. MaxQuant enables high peptide identification rates, individualized p.p.b.-range mass accuracies and proteome-wide protein quantification. *Nat Biotechnol.* 2008 Dec;26(12):1367-72. Epub 2008/11/26. doi:10.1038/nbt.1511. Cited in: Pubmed; PMID 19029910.
23. Cox J, Hein MY, Luber CA, Paron I, Nagaraj N, Mann M. Accurate proteome-wide label-free quantification by delayed normalization and maximal peptide ratio extraction, termed MaxLFQ. *Mol Cell Proteomics.* 2014 Sep;13(9):2513-26. Epub 2014/06/20. doi:10.1074/mcp.M113.031591. Cited in: Pubmed; PMID 24942700.
24. Tyanova S, Temu T, Sinitcyn P, Carlson A, Hein MY, Geiger T, et al. The Perseus computational platform for comprehensive analysis of (prote)omics data. *Nat Methods.*

2016 Sep;13(9):731-40. Epub 2016/06/28. doi:10.1038/nmeth.3901. Cited in: Pubmed; PMID 27348712.

25. Subramanian A, Tamayo P, Mootha VK, Mukherjee S, Ebert BL, Gillette MA, et al. Gene set enrichment analysis: a knowledge-based approach for interpreting genome-wide expression profiles. *Proc Natl Acad Sci U S A*. 2005 Oct 25;102(43):15545-50. eng. Epub 20050930. doi:10.1073/pnas.0506580102. Cited in: Pubmed; PMID 16199517.

26. Mootha VK, Lindgren CM, Eriksson KF, Subramanian A, Sihag S, Lehar J, et al. PGC-1alpha-responsive genes involved in oxidative phosphorylation are coordinately downregulated in human diabetes. *Nat Genet*. 2003 Jul;34(3):267-73. eng. doi:10.1038/ng1180. Cited in: Pubmed; PMID 12808457.

27. Bahrami E, Becker M, Wirth A-K, Schmid JP, Herold T, Öllinger R, et al. A CRISPR/Cas9 Library Screen in Patients' Leukemia Cells In Vivo. *Blood*. 2019;134(Supplement\_1):3945-3945. doi:10.1182/blood-2019-124288.

28. Becker M, Noll-Puchta H, Amend D, Nolte F, Fuchs C, Jeremias I, et al. CLUE: a bioinformatic and wet-lab pipeline for multiplexed cloning of custom sgRNA libraries. *Nucleic Acids Res*. 2020 Jul 27;48(13):e78. Epub 2020/06/02. doi:10.1093/nar/gkaa459. Cited in: Pubmed; PMID 32479629.

29. Doench JG, Fusi N, Sullender M, Hegde M, Vaimberg EW, Donovan KF, et al. Optimized sgRNA design to maximize activity and minimize off-target effects of CRISPR-Cas9. *Nature Biotechnology*. 2016 2016/02/01;34(2):184-191. doi:10.1038/nbt.3437.

30. Sanson KR, Hanna RE, Hegde M, Donovan KF, Strand C, Sullender ME, et al. Optimized libraries for CRISPR-Cas9 genetic screens with multiple modalities. *Nature Communications*. 2018 2018/12/21;9(1):5416. doi:10.1038/s41467-018-07901-8.

31. Li W, Xu H, Xiao T, Cong L, Love MI, Zhang F, et al. MAGECK enables robust identification of essential genes from genome-scale CRISPR/Cas9 knockout screens. *Genome Biol*. 2014;15(12):554. Epub 2014/12/06. doi:10.1186/s13059-014-0554-4. Cited in: Pubmed; PMID 25476604.

32. Afgan E, Baker D, Batut B, van den Beek M, Bouvier D, Cech M, et al. The Galaxy platform for accessible, reproducible and collaborative biomedical analyses: 2018

update. *Nucleic Acids Res.* 2018 Jul 2;46(W1):W537-W544. Epub 2018/05/24. doi:10.1093/nar/gky379. Cited in: Pubmed; PMID 29790989.

33. Wang B, Wang M, Zhang W, Xiao T, Chen CH, Wu A, et al. Integrative analysis of pooled CRISPR genetic screens using MAGeCKFlute. *Nat Protoc.* 2019 Mar;14(3):756-780. Epub 2019/02/03. doi:10.1038/s41596-018-0113-7. Cited in: Pubmed; PMID 30710114.

34. Ståhlberg A, Krzyzanowski PM, Jackson JB, Egyud M, Stein L, Godfrey TE. Simple, multiplexed, PCR-based barcoding of DNA enables sensitive mutation detection in liquid biopsies using sequencing. *Nucleic Acids Res.* 2016 Jun 20;44(11):e105. eng. Epub 2016/04/10. doi:10.1093/nar/gkw224. Cited in: Pubmed; PMID 27060140.

35. Ståhlberg A, Krzyzanowski PM, Egyud M, Filges S, Stein L, Godfrey TE. Simple multiplexed PCR-based barcoding of DNA for ultrasensitive mutation detection by next-generation sequencing. *Nat Protoc.* 2017 Apr;12(4):664-682. eng. Epub 2017/03/03. doi:10.1038/nprot.2017.006. Cited in: Pubmed; PMID 28253235.

36. Zhao L, Liu Z, Levy SF, Wu S. Bartender: a fast and accurate clustering algorithm to count barcode reads. *Bioinformatics (Oxford, England).* 2018 Mar 1;34(5):739-747. eng. Epub 2017/10/27. doi:10.1093/bioinformatics/btx655. Cited in: Pubmed; PMID 29069318.



**Supplemental Table S1. Clinical characteristics of ALL patients donating cells**

| sample  | disease stage* | age [years] | sex | cytogenetics and gene fusions                                                                          | mutations <sup>∞</sup>     | Reference |
|---------|----------------|-------------|-----|--------------------------------------------------------------------------------------------------------|----------------------------|-----------|
| ALL-50  | ID             | 7           | F   | TCF3-PBX1; t(1;19)                                                                                     | N.D.                       | 1,2       |
| ALL-199 | R2             | 8           | F   | germline trisomy 21;<br>Somatic: homozygous 9p deletion (CDKN2A); P2RY8-CRLF2 fusion (Ph-like subtype) | KRAS                       | 1,2,3,4,5 |
| ALL-265 | R1             | 5           | F   | hyperdiploidy (+6,+13,+14,+17,+18,+21,+X)                                                              | KMT2D, HERC1, CSMD1, PRRT2 | 1,3,4,5   |
| ALL-502 | R              | 10          | F   | DUX4 fusion                                                                                            | N.D.                       |           |
| ALL-707 | ID             | 2           | M   | t(4;11)<br>KMT2A-AFF1                                                                                  | N.D.                       | 1,4       |

\*when the primary sample was obtained; <sup>∞</sup> mutations determined by panel sequencing; ID = initial diagnosis; R1 = 1<sup>st</sup> relapse; R2 = 2<sup>nd</sup> relapse; F = female; M = male; N.D. not determined.

<sup>1</sup> Heckl et al., Leuk Lymphoma 2019

<sup>2</sup> Terziyska et al., PlosOne 2012

<sup>3</sup> Ebinger et al., Cancer Cell 2016

<sup>4</sup> Carlet et al., Nat Comm 2021

<sup>5</sup> Liu et al., Biomark Res 2020

**Supplemental Table S2. Somatic CNAs in PDX ALL-199 donor and resistant derivatives**  
 Start and end position of hg19 reference genome. Ratio was calculated as sample/complete remission. Only ratio >1.1 or <0.9 are listed.

| Sample    | Chr | Start     | Stop      | NumExons | Size(bp)   | Ratio  | Sample | Chr | Start     | Stop      | NumExons | Size(bp) | Ratio  |
|-----------|-----|-----------|-----------|----------|------------|--------|--------|-----|-----------|-----------|----------|----------|--------|
| Donor     | 1   | 219352484 | 249212567 | 2050     | 29860083   | 0.4991 | D5     | 1   | 69085     | 28537153  | 3939     | 28468068 | 0.5373 |
| Donor     | 6   | 25921229  | 33385092  | 1668     | 7463863    | 1.2423 | D5     | 1   | 156518135 | 218614709 | 4804     | 62096574 | 1.4725 |
| Donor     | 6   | 117639346 | 170893674 | 2647     | 53254328   | 1.4260 | D5     | 1   | 219347228 | 249212567 | 2051     | 29865339 | 0.5114 |
| Donor     | 7   | 48685008  | 55606355  | 130      | 6921347    | 0.4750 | D5     | 6   | 117252489 | 149959688 | 1448     | 32707199 | 1.8339 |
| Donor     | 13  | 41556114  | 115091761 | 2235     | 73534527   | 1.4086 | D5     | 6   | 149982860 | 170893674 | 1210     | 20910814 | 2.0160 |
| Donor     | 14  | 19377589  | 25326368  | 1118     | 5939469    | 1.9145 | D5     | 7   | 48685008  | 56144587  | 182      | 7459579  | 0.5824 |
| Donor     | 17  | 25636121  | 39767487  | 2269     | 14121763   | 1.5241 | D5     | 7   | 56145790  | 65444903  | 80       | 9299113  | 1.5071 |
| Donor     | 17  | 39767592  | 81052325  | 5776     | 41284733   | 1.5642 | D5     | 13  | 41556114  | 115091761 | 2235     | 73528008 | 1.4219 |
| Donor     | 19  | 6833190   | 15383915  | 2247     | 8550725    | 1.6591 | D5     | 14  | 19377589  | 24518025  | 731      | 5137873  | 1.8630 |
| Untreated | 1   | 220088786 | 249212567 | 2046     | 29123781   | 0.5068 | D5     | 17  | 25638530  | 39780766  | 2278     | 14132633 | 1.4524 |
| Untreated | 6   | 117252489 | 170893674 | 2658     | 53641185   | 1.4850 | D5     | 17  | 39845286  | 81052325  | 5765     | 41207039 | 1.5162 |
| Untreated | 7   | 48685008  | 56140809  | 179      | 7455801    | 0.5669 | D5     | 19  | 6833190   | 15383915  | 2247     | 8550725  | 1.6231 |
| Untreated | 7   | 56141862  | 65444903  | 83       | 9303041    | 1.4464 | D6     | 1   | 69085     | 17087602  | 2243     | 16913580 | 0.5139 |
| Untreated | 13  | 41556114  | 78218414  | 1096     | 36659525   | 1.4553 | D6     | 1   | 17090904  | 32658337  | 2108     | 15567433 | 0.5485 |
| Untreated | 13  | 78272044  | 115091761 | 1139     | 36819717   | 1.4752 | D6     | 1   | 219347228 | 249212567 | 2051     | 29865339 | 0.4974 |
| Untreated | 14  | 19377589  | 24518025  | 731      | 5133266    | 1.8362 | D6     | 6   | 25921229  | 33384558  | 1665     | 7463329  | 1.2251 |
| Untreated | 17  | 25638530  | 39767487  | 2267     | 14119354   | 1.4480 | D6     | 6   | 117641026 | 170893674 | 2646     | 53252648 | 1.4199 |
| Untreated | 17  | 39767592  | 81052325  | 5776     | 41284733   | 1.4886 | D6     | 7   | 48685008  | 55606355  | 130      | 6921347  | 0.4625 |
| Untreated | 19  | 6833190   | 15383915  | 2247     | 8550725    | 1.5561 | D6     | 13  | 41556114  | 78202149  | 1091     | 36642401 | 1.4199 |
| D1        | 1   | 159141551 | 169799487 | 1009     | 10657434   | 1.5453 | D6     | 13  | 78208509  | 115091761 | 1144     | 36883252 | 1.4022 |
| D1        | 1   | 169799832 | 218614709 | 3348     | 48814877   | 1.4602 | D6     | 14  | 19377589  | 24518025  | 731      | 5136347  | 1.7654 |
| D1        | 1   | 219347228 | 249212567 | 2051     | 29865339   | 0.4993 | D6     | 17  | 25637082  | 39780766  | 2279     | 14134081 | 1.5252 |
| D1        | 6   | 25921229  | 33382326  | 1659     | 7461097    | 1.2557 | D6     | 17  | 39845286  | 81052325  | 5765     | 41207039 | 1.5719 |
| D1        | 6   | 117641026 | 148846506 | 1375     | 31205480   | 1.7829 | D6     | 19  | 110674    | 6821875   | 1848     | 6711201  | 1.2959 |
| D1        | 6   | 148848584 | 170893674 | 1271     | 22045090   | 1.9847 | D6     | 19  | 6822227   | 15383915  | 2258     | 8561688  | 1.7129 |
| D1        | 7   | 48685008  | 55606355  | 130      | 6921347    | 0.4641 | D7     | 1   | 69085     | 32043064  | 4169     | 31973979 | 0.5303 |
| D1        | 13  | 41556114  | 115091761 | 2235     | 73528154   | 1.4044 | D7     | 1   | 149755554 | 161790956 | 2633     | 12035402 | 1.6407 |
| D1        | 14  | 19377589  | 24518025  | 731      | 5137873    | 1.8394 | D7     | 1   | 161816234 | 218614709 | 3815     | 56798475 | 1.4565 |
| D1        | 17  | 6006      | 25637205  | 3515     | 25631199   | 0.5485 | D7     | 1   | 219347228 | 249212567 | 2051     | 29865339 | 0.4990 |
| D1        | 19  | 7075661   | 15383915  | 2205     | 8308254    | 1.6969 | D7     | 6   | 25921229  | 33391380  | 1673     | 7470151  | 1.2198 |
| D1        | X   | 109693841 | 134978493 | 1001     | 25270278   | 0.5904 | D7     | 6   | 117252489 | 149944424 | 1446     | 32691935 | 1.7811 |
| D1        | X   | 134983713 | 155240079 | 1167     | 20256366   | 0.6029 | D7     | 6   | 149953890 | 170893674 | 1212     | 20939784 | 1.9715 |
| D2        | 1   | 219347228 | 249212567 | 2051     | 29865339   | 0.5114 | D7     | 7   | 48685008  | 55606355  | 130      | 6921347  | 0.4601 |
| D2        | 6   | 117638301 | 170893674 | 2648     | 53255373   | 1.4762 | D7     | 7   | 151962118 | 158937468 | 292      | 6975350  | 0.7737 |
| D2        | 7   | 48685008  | 56130783  | 176      | 7445775    | 0.5607 | D7     | 13  | 41556114  | 78202149  | 1091     | 36642401 | 1.3984 |
| D2        | 7   | 56131943  | 65445401  | 87       | 9313458    | 1.4955 | D7     | 13  | 78208509  | 115091761 | 1144     | 36883252 | 1.4298 |
| D2        | 13  | 41639147  | 115091761 | 2232     | 73398113   | 1.3384 | D7     | 14  | 19377589  | 24518025  | 731      | 5135702  | 1.7770 |
| D2        | 14  | 19377589  | 24518025  | 731      | 5135702    | 1.7665 | D7     | 17  | 25638530  | 39767487  | 2267     | 14119354 | 1.5289 |
| D2        | 17  | 6006      | 25636303  | 3514     | 25630297   | 0.5546 | D7     | 17  | 39767592  | 81052325  | 5776     | 41284733 | 1.5776 |
| D2        | 19  | 6833190   | 15383915  | 2247     | 8550725    | 1.5696 | D7     | 19  | 6833190   | 15383915  | 2247     | 8550725  | 1.6930 |
| D4        | 1   | 69085     | 31740784  | 4135     | 31671699   | 0.5197 | D8     | 1   | 220088786 | 249212567 | 2046     | 29123781 | 0.4991 |
| D4        | 1   | 219347228 | 249212567 | 2051     | 29865339   | 0.5110 | D8     | 6   | 25917192  | 33384558  | 1667     | 7467366  | 1.2628 |
| D4        | 6   | 117638301 | 170893674 | 2648     | 53255373   | 1.5261 | D8     | 6   | 117641026 | 170893674 | 2646     | 53252648 | 1.4120 |
| D4        | 7   | 48685008  | 56140809  | 179      | 7455801    | 0.5872 | D8     | 7   | 48685008  | 55606355  | 130      | 6921347  | 0.4711 |
| D4        | 7   | 56141862  | 65444903  | 83       | 9303041    | 1.4762 | D8     | 7   | 151944982 | 158937468 | 298      | 6992486  | 0.7650 |
| D4        | 13  | 41639147  | 96684230  | 1309     | 55041881   | 1.4888 | D8     | 13  | 41556114  | 115091761 | 2235     | 73534527 | 1.3973 |
| D4        | 13  | 96705404  | 115091761 | 923      | 18386357   | 1.4668 | D8     | 14  | 19377589  | 24518025  | 731      | 5137228  | 1.8605 |
| D4        | 17  | 26091002  | 39594873  | 2163     | 13494353   | 1.4045 | D8     | 17  | 25638530  | 39777136  | 2273     | 14129003 | 1.5308 |
| D4        | 17  | 39594944  | 81052325  | 5843     | 41457381   | 1.4430 | D8     | 17  | 39777213  | 81052325  | 5770     | 41275112 | 1.5820 |
| D4        | 19  | 6833190   | 24310787  | 3582     | 17,334,207 | 1.5033 | D8     | 19  | 7075661   | 15383915  | 2205     | 8308254  | 1.7127 |

**Supplemental Table S3. CNAs in PDX ALL-50 donor and resistant derivatives.** Donor is compared to primary patient leukemia sample; untreated and resistant are compared to donor. Start and end position of hg19 reference genome. Ratio was calculated as sample vs. control. Only ratio >1.1 or <0.9 are listed.

| Sample | Chr. | Start     | Stop      | NumExons | Size(bp) | Ratio  | Sample | Chr. | Start     | Stop      | NumExons | Size(bp) | Ratio  |
|--------|------|-----------|-----------|----------|----------|--------|--------|------|-----------|-----------|----------|----------|--------|
| Donor  | 1    | 16903807  | 17086186  | 23       | 182379   | 1,1967 | D3     | 1    | 16890433  | 17090980  | 40       | 200547   | 0,3327 |
| Donor  | 1    | 148016404 | 164790868 | 2842     | 16774464 | 0,8486 | D3     | 1    | 145312673 | 149858195 | 496      | 4545522  | 0,8648 |
| Donor  | 1    | 164815816 | 186957645 | 1715     | 22141829 | 0,8922 | D3     | 1    | 248616094 | 248738063 | 6        | 121969   | 0,3284 |
| Donor  | 1    | 190067143 | 193219847 | 76       | 3152704  | 0,5816 | D3     | 2    | 97749487  | 98201866  | 124      | 452379   | 0,5977 |
| Donor  | 1    | 196197349 | 227171560 | 2514     | 30974211 | 1,1847 | D3     | 2    | 107021670 | 108507192 | 52       | 1485522  | 0,3956 |
| Donor  | 1    | 227171790 | 245245469 | 1241     | 18073679 | 1,1391 | D3     | 2    | 108604607 | 114709427 | 577      | 6104820  | 0,8688 |
| Donor  | 1    | 245246739 | 249212567 | 207      | 3965828  | 1,2507 | D3     | 2    | 128947286 | 130953949 | 54       | 2006663  | 0,4634 |
| Donor  | 2    | 130872449 | 131096810 | 40       | 224361   | 1,1867 | D3     | 2    | 131975971 | 132290647 | 31       | 314676   | 0,3565 |
| Donor  | 6    | 32487142  | 32709307  | 20       | 222165   | 0,5255 | D3     | 3    | 74570204  | 75790892  | 10       | 1156126  | 0,8001 |
| Donor  | 6    | 71162190  | 73787225  | 86       | 2625035  | 1,2116 | D3     | 4    | 69519750  | 69693271  | 10       | 173521   | 0,6215 |
| Donor  | 6    | 91228972  | 116720834 | 846      | 25491862 | 1,1909 | D3     | 4    | 69696313  | 71275797  | 120      | 1579484  | 0,8936 |
| Donor  | 6    | 122775291 | 130414009 | 309      | 7638718  | 1,1803 | D3     | 5    | 175386967 | 175535683 | 21       | 148716   | 0,1339 |
| Donor  | 7    | 193195    | 57529660  | 2924     | 57336465 | 1,3995 | D3     | 7    | 66463799  | 66648228  | 12       | 184429   | 0,4479 |
| Donor  | 7    | 63505995  | 74133265  | 440      | 10627270 | 0,7737 | D3     | 7    | 66660152  | 72733056  | 80       | 6072904  | 0,7914 |
| Donor  | 7    | 75034460  | 100608374 | 1935     | 25518520 | 0,7677 | D3     | 7    | 143880592 | 144071987 | 16       | 191395   | 0,2472 |
| Donor  | 7    | 100608721 | 102114136 | 194      | 1505415  | 0,7782 | D3     | 7    | 151904380 | 152520605 | 35       | 616225   | 0,3732 |
| Donor  | 7    | 102448732 | 152007165 | 3197     | 49556535 | 0,7801 | D3     | 8    | 7272478   | 7752297   | 45       | 467684   | 0,8732 |
| Donor  | 7    | 152008878 | 158937468 | 289      | 6928590  | 0,7605 | D3     | 8    | 144662671 | 145193721 | 244      | 530952   | 1,1143 |
| Donor  | 9    | 14802     | 21481698  | 875      | 21375105 | 0,6312 | D3     | 9    | 96098153  | 96278556  | 10       | 180403   | 0,5962 |
| Donor  | 9    | 21802743  | 27950674  | 125      | 6147931  | 0,0232 | D3     | 10   | 51620319  | 51829476  | 14       | 209157   | 0,3016 |
| Donor  | 9    | 32405500  | 39178362  | 899      | 6772862  | 0,7511 | D3     | 10   | 81272401  | 81373874  | 10       | 101473   | 0,4698 |
| Donor  | 9    | 75773447  | 82337955  | 287      | 6564508  | 0,6016 | D3     | 11   | 49053823  | 55035853  | 39       | 5982030  | 0,6351 |
| Donor  | 11   | 132306548 | 134257558 | 143      | 1951010  | 0,8946 | D3     | 11   | 88583069  | 89535105  | 49       | 952036   | 0,7593 |
| Donor  | 13   | 92797078  | 95860184  | 69       | 3063106  | 1,1757 | D3     | 11   | 89536861  | 89645259  | 9        | 108398   | 0,0392 |
| Donor  | 16   | 69973739  | 70417143  | 91       | 443404   | 1,1051 | D3     | 13   | 24558028  | 24895911  | 19       | 324662   | 1,1244 |
| Donor  | 17   | 12920174  | 15641396  | 67       | 2721222  | 1,1391 | D3     | 14   | 19377589  | 19574357  | 10       | 196768   | 0,0514 |
| Donor  | 21   | 10906900  | 15002226  | 33       | 3965496  | 0,8062 | D3     | 14   | 19582966  | 20249428  | 14       | 666462   | 0,8002 |
| U1     | 1    | 16905683  | 17086990  | 25       | 181307   | 0,8463 | D3     | 15   | 30669228  | 31203048  | 50       | 533820   | 0,7219 |
| U1     | 4    | 53378     | 337702    | 10       | 278396   | 1,1177 | D3     | 15   | 32449804  | 32921008  | 69       | 471204   | 0,6135 |
| U1     | 5    | 36257038  | 36971143  | 26       | 714105   | 0,8621 | D3     | 15   | 43873195  | 44061849  | 78       | 188654   | 0,6823 |
| U1     | 16   | 14960407  | 15116616  | 38       | 156209   | 0,8647 | D3     | 16   | 14947319  | 15186476  | 82       | 239157   | 0,5046 |
| U1     | 16   | 20448585  | 20554589  | 20       | 106004   | 0,8007 | D3     | 16   | 20448585  | 20576172  | 29       | 127587   | 0,3768 |
| U1     | 17   | 12913925  | 15642149  | 74       | 2728224  | 0,8519 | D3     | 16   | 69996874  | 70180136  | 16       | 183262   | 0,2822 |
| U1     | 19   | 50542413  | 50666456  | 10       | 124043   | 1,2636 | D3     | 16   | 70182362  | 70417143  | 64       | 234781   | 0,8202 |
| U2     | 1    | 16905683  | 17086990  | 25       | 181307   | 0,8215 | D3     | 17   | 13399509  | 15642149  | 66       | 2242640  | 0,5356 |
| U2     | 7    | 5792472   | 6018332   | 43       | 225860   | 0,8261 | D3     | 17   | 18390956  | 18708885  | 44       | 317929   | 0,5059 |
| U2     | 9    | 140070155 | 140483175 | 194      | 413020   | 1,1122 | D3     | 17   | 44407811  | 44632795  | 25       | 224984   | 0,3537 |
| U2     | 10   | 51620319  | 51829476  | 14       | 209157   | 0,8041 | D3     | 18   | 14803728  | 18539894  | 18       | 3736166  | 0,3602 |
| U2     | 11   | 73179445  | 73357676  | 2        | 178231   | 1,4018 | D3     | 19   | 22574313  | 22951207  | 9        | 376894   | 0,5116 |
| U2     | 16   | 14960407  | 15116616  | 38       | 156209   | 0,8079 | D3     | 20   | 45630062  | 45848980  | 17       | 218918   | 0,8495 |
| U2     | 16   | 20448585  | 20576172  | 29       | 127587   | 0,8109 | D3     | 21   | 10906900  | 15011964  | 35       | 102400   | 0,0167 |
| U2     | 16   | 69996874  | 70182461  | 17       | 185587   | 0,8431 | D3     | 21   | 15013661  | 42830713  | 1078     | 27817052 | 1,2179 |
| U2     | 17   | 12920383  | 15640842  | 65       | 2720459  | 0,8300 | D3     | 21   | 42838064  | 48084291  | 859      | 5246227  | 1,2841 |
| D1     | 1    | 16905683  | 17086772  | 24       | 181089   | 0,8397 | D3     | 22   | 16258181  | 16449809  | 11       | 191628   | 0,1214 |
| D1     | 2    | 130845635 | 130953949 | 46       | 108314   | 0,8935 | D3     | 22   | 42524171  | 42970066  | 35       | 445895   | 0,7170 |
| D1     | 5    | 148431700 | 148630987 | 22       | 199287   | 1,1731 | D3     | X    | 148663883 | 149613883 | 22       | 950000   | 0,6860 |
| D1     | 7    | 5940099   | 6042272   | 43       | 102173   | 0,8278 | D4     | 1    | 16903807  | 17086990  | 26       | 183183   | 0,7967 |
| D1     | 10   | 33221438  | 33474657  | 5        | 253219   | 1,4339 | D4     | 2    | 97638270  | 98264576  | 131      | 626306   | 0,8943 |
| D1     | 10   | 135373590 | 135498455 | 12       | 124865   | 0,8426 | D4     | 2    | 114195441 | 114513126 | 38       | 317685   | 0,8421 |
| D1     | 11   | 134131627 | 134257558 | 46       | 125931   | 0,8858 | D4     | 3    | 74548805  | 75790892  | 11       | 1176991  | 0,7640 |
| D1     | 14   | 19377589  | 20002300  | 15       | 624711   | 0,8990 | D4     | 5    | 15500781  | 15928615  | 3        | 427834   | 1,4669 |
| D1     | 16   | 14958437  | 15186476  | 77       | 228039   | 0,8756 | D4     | 6    | 75947641  | 85473904  | 395      | 9526263  | 0,8956 |
| D1     | 16   | 20432575  | 20634899  | 37       | 202324   | 0,8331 | D4     | 6    | 86159853  | 97702614  | 435      | 11542761 | 0,8343 |
| D1     | 17   | 13399509  | 15642149  | 66       | 2242640  | 0,8616 | D4     | 6    | 150111085 | 150266713 | 24       | 155628   | 0,8264 |
| D1     | 19   | 21580035  | 22379440  | 30       | 799405   | 1,1215 | D4     | 7    | 66479349  | 72717531  | 77       | 6238182  | 0,8852 |
| D1     | 20   | 23546606  | 23966422  | 21       | 419816   | 0,8692 | D4     | 10   | 21435266  | 22616726  | 56       | 1181460  | 1,1323 |
| D1     | 22   | 25434722  | 26105936  | 38       | 671214   | 1,1022 | D4     | 12   | 7890020   | 8077112   | 27       | 187092   | 0,7879 |
| D1     | X    | 48054721  | 48270312  | 26       | 215591   | 0,8765 | D4     | 16   | 20448585  | 20634899  | 30       | 186314   | 0,8210 |
| D2     | 2    | 132290581 | 132558515 | 6        | 267934   | 1,2348 | D4     | 17   | 13399509  | 15640842  | 63       | 2241333  | 0,8286 |
| D2     | 3    | 53922415  | 54615909  | 11       | 693494   | 0,7491 | D4     | 20   | 23667720  | 23966616  | 14       | 298896   | 0,8150 |
| D2     | 9    | 127618514 | 127765854 | 43       | 147340   | 1,1485 | D4     | 21   | 10906900  | 44841684  | 1369     | 29933519 | 1,3101 |
| D2     | 9    | 140218537 | 140331766 | 39       | 113229   | 1,2186 | D4     | 21   | 44841849  | 45170431  | 34       | 328582   | 1,1818 |
| D2     | 14   | 31188526  | 31344314  | 7        | 155788   | 0,7072 | D4     | 21   | 45172394  | 47633754  | 421      | 2460684  | 1,3863 |
| D2     | 14   | 66975241  | 67346756  | 5        | 371515   | 1,3198 | D4     | 21   | 47635089  | 48084291  | 148      | 449202   | 1,3515 |
| D2     | 21   | 45820137  | 46908363  | 124      | 1088226  | 1,1314 | D4     | 22   | 24176323  | 24325240  | 40       | 148288   | 1,1122 |
|        |      |           |           |          |          |        | D4     | 22   | 39175449  | 39353730  | 14       | 178281   | 1,2855 |
|        |      |           |           |          |          |        | D5     | 1    | 16905683  | 17087602  | 27       | 181668   | 0,8283 |
|        |      |           |           |          |          |        | D5     | 2    | 97638270  | 97757448  | 9        | 119178   | 0,7904 |
|        |      |           |           |          |          |        | D5     | 4    | 109680900 | 109783706 | 23       | 102806   | 0,8399 |
|        |      |           |           |          |          |        | D5     | 7    | 32914599  | 33044968  | 14       | 130369   | 0,8267 |
|        |      |           |           |          |          |        | D5     | 7    | 66563523  | 69599562  | 9        | 3036039  | 0,7330 |
|        |      |           |           |          |          |        | D5     | 9    | 140777191 | 140901341 | 14       | 124150   | 1,1468 |
|        |      |           |           |          |          |        | D5     | 11   | 88337881  | 89607452  | 57       | 1269571  | 0,8753 |
|        |      |           |           |          |          |        | D5     | 16   | 14960407  | 15127261  | 44       | 166854   | 0,8440 |
|        |      |           |           |          |          |        | D5     | 16   | 20432575  | 20634899  | 37       | 202324   | 0,8213 |
|        |      |           |           |          |          |        | D5     | 17   | 12913925  | 15640842  | 71       | 2726917  | 0,8654 |
|        |      |           |           |          |          |        | D5     | 21   | 10906900  | 11098742  | 25       | 111198   | 0,7516 |

**Supplemental Table S4. TP53 mutations in resistant ALL-199**

| Position      | Region                                    | Mutation | Sample | VAF | # Reads |
|---------------|-------------------------------------------|----------|--------|-----|---------|
| Chr17:7579699 | Exon3 splice site                         | C>T      | D2     | 82% | 89      |
|               |                                           |          | Donor  | 0%  | 3204    |
| Chr17:7577093 | Exon 8, Codon R282,<br>DNA-binding domain | insC     | D1     | 95% | 39      |
|               |                                           |          | Donor  | 0%  | 8233    |

**Supplemental Table S5. Cancer-related mutations in resistant ALL-50** - Provided as Excel file

**Supplemental Table S6. Expression of genes on 1p36 in 1p-deleted vs. 1p-WT resistant derivatives of ALL-199** - Provided as Excel file

**Supplemental Table S7. Transcriptome of ALL-199** - Provided as Excel file

**Supplemental Table S8. Proteome of ALL-199** - Provided as Excel file

**Supplemental Table S9. Gene set enrichment analysis. Gene sets enriched in resistant vs. untreated ALL-199 in Transcriptome** - Provided as Excel file

**Supplemental Table S10. Gene set enrichment analysis. Gene sets enriched in resistant vs. untreated ALL-199 in Proteome** - Provided as Excel file

**Supplemental Table S11. Composition of the sgRNA library**

| Group                                        | Number of genes | Number of sgRNAs |
|----------------------------------------------|-----------------|------------------|
| Upregulated in Proteome                      | 81              | 405              |
| Upregulated in Transcriptome                 | 135             | 675              |
| Upregulated in Proteome AND<br>Transcriptome | 7               | 35               |
| Positive control                             | 11              | 55               |
| Non-targeting control                        | NA              | 26               |
| <b>Total</b>                                 | <b>234</b>      | <b>1196</b>      |

**Supplemental Table S12. MAGeCK analysis of CRISPR/Cas9 in vivo screen**  
- Provided as Excel file

**Figure S1**

**A**

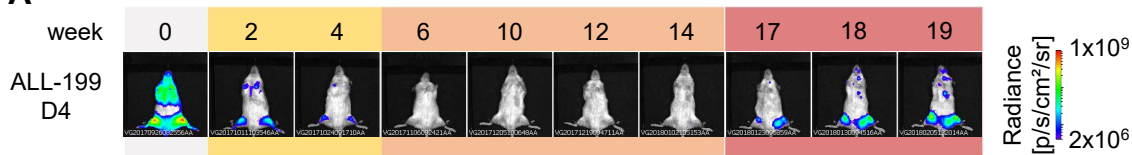

**B**

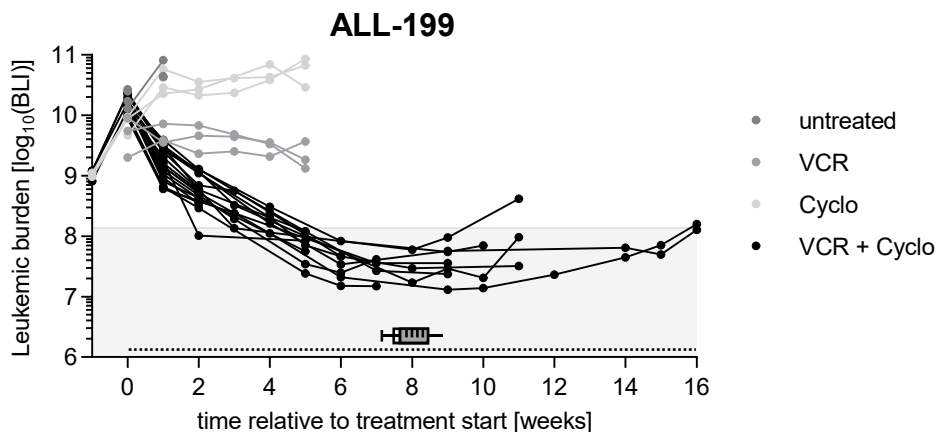

**C**

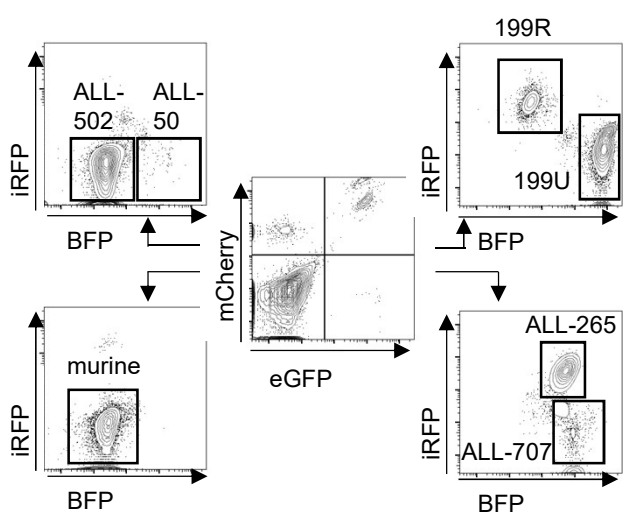

**D**

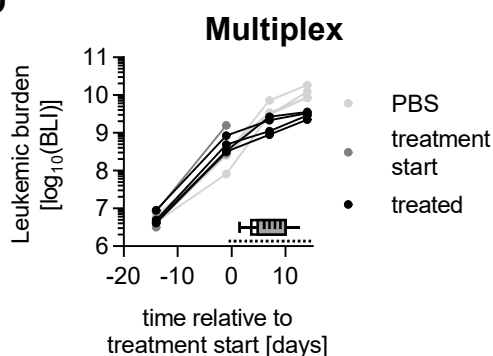

**E**

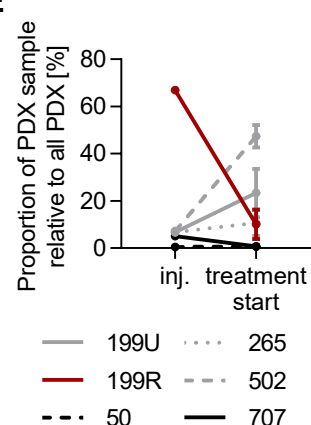

**F**

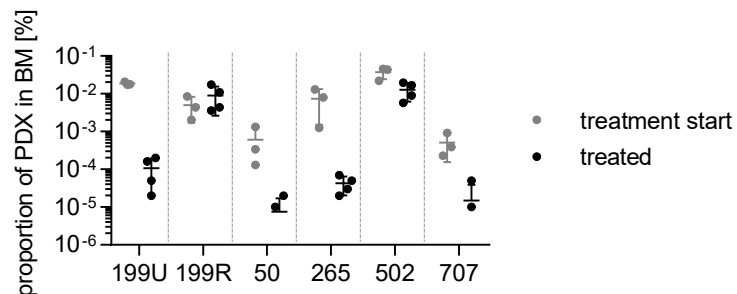

**G**

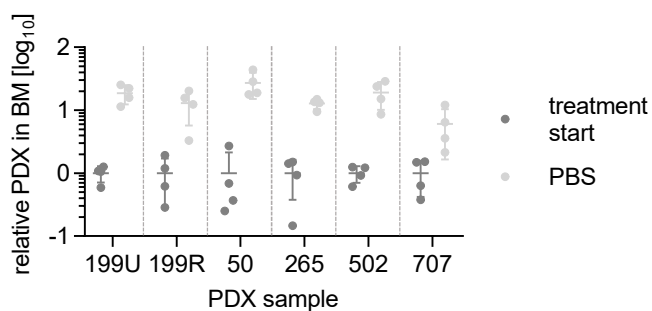

**H**

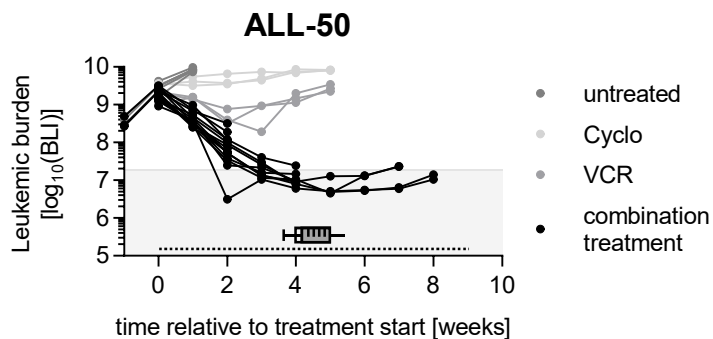

**I**

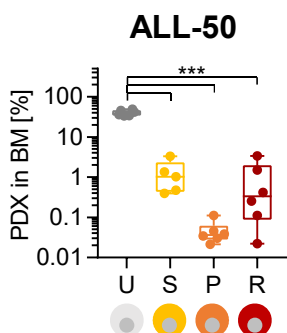

**J**

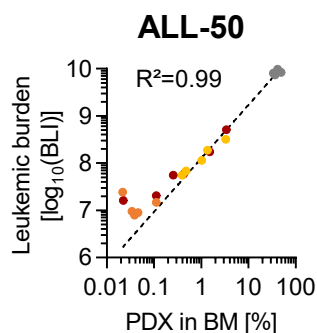

**K**

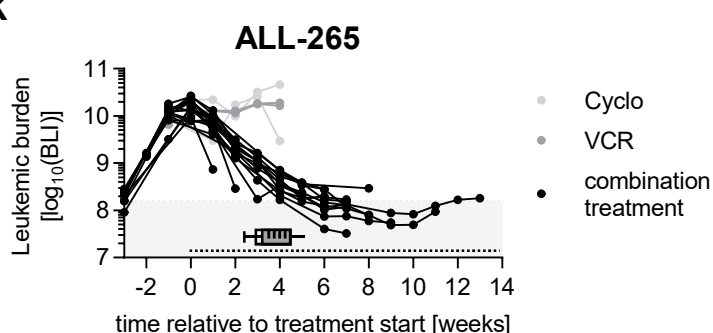

## Supplementary Figure S1. An *in vivo* model of acquired resistance in PDX ALL.

Complementary data to Figure 1

**A - B PDX cells acquire resistance during prolonged treatment pressure.** Complementary data to experiment depicted in Figure 1A-F.

**A** Representative imaging pictures of mouse (D4) as described in Figure 1B.

**B** Quantification of bioluminescence imaging (BLI) signals complementing Figure 1C. Individual mice of single treatment groups, untreated all remaining mice not included in Figure 1C are shown.

**C - G Multiplexed analysis of treatment response of 5 PDX ALL models in the same mouse.**

Complementary data to experiment depicted in Figure 1H,I.

**C** Gating strategy for analysis of PDX multiplex experiment. PDX cells of 6 individual PDX populations were isolated from one representative mouse and were distinguished by specific fluorochrome marker combinations. Negative population represents murine cells.

**D** Quantification of bioluminescence imaging (BLI) signals of mice of the multiplex experiment described in Figure 1H. Each dot represents 1 measurement and each line represents 1 mouse (n=4 per group). Dashed line indicates treatment period.

**E** Proportion of each PDX sample from the experiment described in Figure 1H was measured by flow cytometry before injection (inj.) and after re-isolation from the murine bone marrow at start of treatment. Mean +/- SD of each PDX sample in 4 mice at treatment start is shown.

**F** Data as in Figure 1I, except that the number of PDX cells relative to the total number of cells isolated from the murine BM is shown. One dot represents the PDX population of one PDX ALL sample within one mouse.

**G** Data as in Figure 1I, except that PBS control group is shown. Proportion of each PDX sample treated with PBS was normalized to the mean proportion of the respective sample within the mix at treatment start. One dot represents the PDX population of one PDX ALL sample within one mouse.

**H- K Acquired resistance in ALL-50.**

Complementary data to experiment depicted in Figure 1J.

**H** Quantification of imaging signals complementing Figure 1J. Individual mice of single treatment groups, untreated mice and all remaining mice not included in Figure 1C are shown.

**I** Proportion of PDX ALL-50 cells in murine BM was determined and is depicted as boxplot with median, 25<sup>th</sup> and 75<sup>th</sup> percentile and min/max indicated by whiskers; each dot represents one mouse; colors as defined in Figure 1A. \*\*\*:  $p < 0.001$  by one-way ANOVA followed by Tukey's multiple comparisons test.

**J** Correlation of imaging signals (Figure 1J and S1F) and PDX proportion in murine BM as determined by flow cytometry (Figure S1G); each dot represents one mouse. Correlation curve and  $R^2$  were calculated using non-linear regression.

**K Acquired resistance in ALL-265.** Experiment was performed as described in Figure 1A,C, except that ALL-265 was used and mice were treated with 0.3 mg/kg VCR and 70 mg/kg Cyclo. Quantification of bioluminescence imaging (BLI) signals is shown. Each line represents one mouse for VCR (n=2), Cyclo (n=2), and combination treatment (n=19). Dashed line indicates treatment period.

**Figure S2**

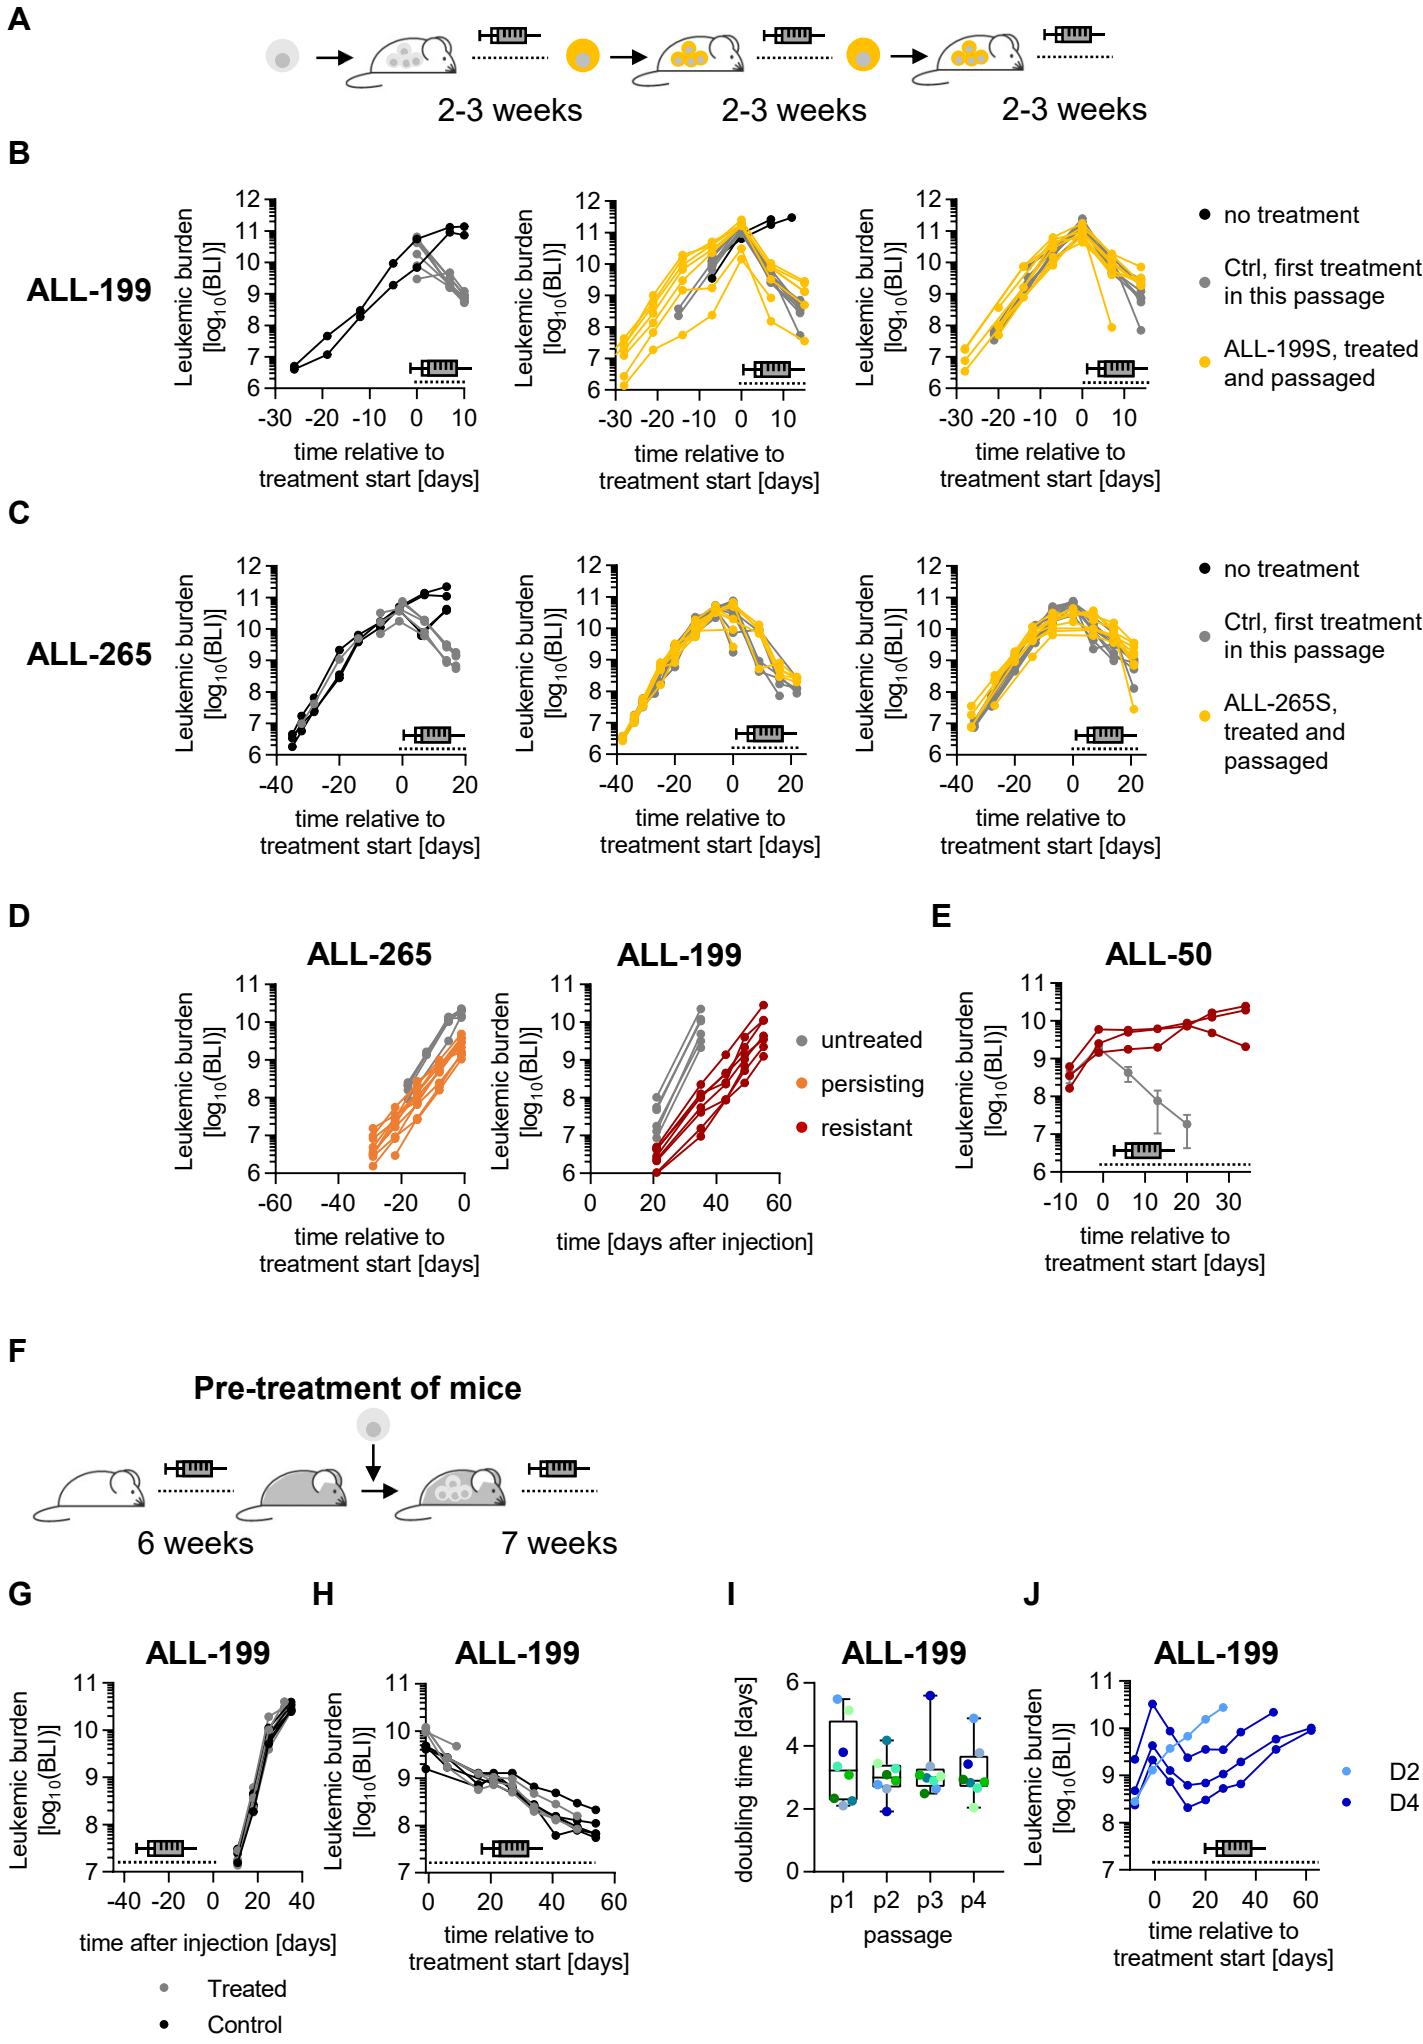

**Supplementary Figure S2. Functional characterization of PDX ALL at distinct stages following treatment start.** Complementary data to Figure 2

**A-C Re-transplantation preserves sensitive phenotype.**

Experimental procedure (A): In a first passage (left panel) ALL-199 (B) or ALL-265 (C) cells were engrafted into NSG mice and either treated (grey; n=8 ALL-199, n=6 ALL-265) for 2 or 3 weeks with combination chemotherapy (treatment was performed as described in Fig. 1 except that 0.5 mg/kg VCR and 100 mg/kg Cyclo were used) or were left untreated (black, n=2 ALL-199, n=6 ALL-265). Cells were isolated and re-transplanted into secondary recipient mice and treated again with the identical treatment regimen (middle panels, yellow, n=8 for ALL-199, n=9 for ALL-265,) or left untreated (black, n=2 for ALL-199). The procedure was repeated for a third passage (right panels, yellow, n=8). In parallel, previously untreated cells of ALL-199 (B) or ALL-265 (C) were engrafted and treated with the same treatment regimen, serving as controls (middle and right panels, grey, n=8 for ALL-199, n=9 for middle panel of ALL-265, n=8 for right panel of ALL-265). Growth was monitored by repetitive imaging and imaging signals were quantified and are plotted for each passage. Data of middle panel of ALL-199 is also shown in Fig. 2B; each line represents one mouse. Dashed line and the syringe symbol indicate treatment period.

- D** Analysis of growth in secondary recipient mice. Quantification of imaging signals used to calculate doubling time of ALL-265 and ALL-199 in Figure 2C and 2D is shown.
- E** Analysis of treatment response of ALL-50R in secondary recipient mice. Experiment was set up exactly as described in Figure 2D except that ALL-50R (red, n=3) and adjusted drug doses (0.25 mg/kg VCR and 70 mg/kg Cyclo) were used. Data from untreated ALL-50 cells (grey, mean +/- SD of n=20 mice) derived from experiment described in Figure 1J as included for comparison. Dashed line indicates treatment period.

**F- H Pre-treatment of mice does not influence cell growth or treatment response.**

Experimental procedure (F): ALL-199 cells were injected into NSG mice which were either pre-treated with combination chemotherapy (n=10, treatment was performed as described in Fig. 1, VCR 0.15 mg/kg, Cyclo 70 mg/kg) for 6 weeks before cell injection or into control mice without pre-treatment (n=10). N=5 mice per group were injected with low cell numbers and engraftment and growth was monitored (G) by imaging. N=5 mice per group were injected with high cell numbers and at high leukemia burden, all mice were treated with combination chemotherapy (treatment was performed as described in Fig. 1, VCR 0.15 mg/kg, Cyclo 70 mg/kg) for 7 weeks. Engraftment and growth (G) and treatment response (H) was monitored by imaging. Each line represents one mouse.

**I – J Resistance remains stable despite prolonged drug holiday.** Complementary data to Figure 2E.

- I** Doubling times of resistant ALL-199 derivatives D1-D8 were calculated based on imaging during serial passaging as shown in Figure 2E. Each dot represents one mouse, each color indicates one derivative. One-way ANOVA followed by Tukey's multiple comparisons test revealed no significant difference.
- J** Combination Chemotherapy of the 4<sup>th</sup> passage was repeated with additional mice harboring ALL-199 D4 (n=3) and D2 (n=1) cells. Each line represents one mouse, each color indicates one derivative. Dashed line indicates treatment period.



Figure S3

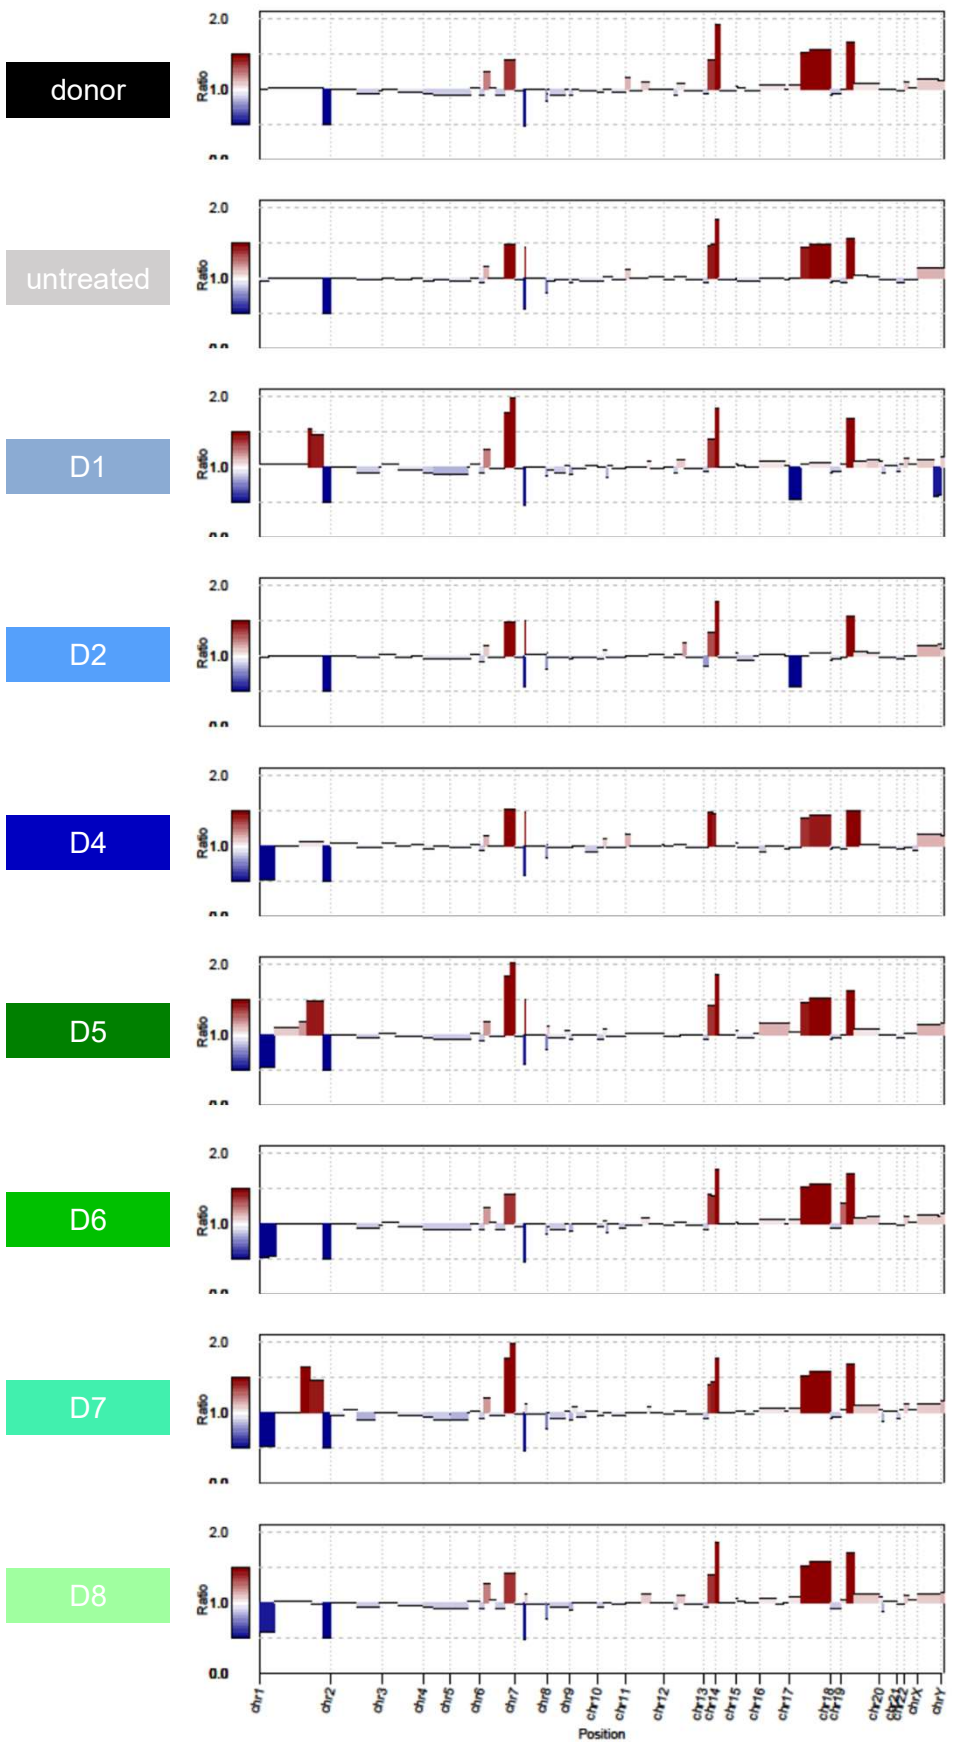

**Supplementary Figure S3. CNAs of resistant derivatives of ALL-199.** Complementary data to Figure 3A-E.

CNA of donor ALL-199 PDX cells, untreated ALL-199U and resistant ALL-199R derivatives as determined by whole exome sequencing. Losses compared to germ line control are depicted in blue and gains in red. Cut-offs for a copy number segment: min. size 5Mb, max. five segments per Chromosome, cut-off for CNA call <0.8 or >1.2, respectively.

Figure S4

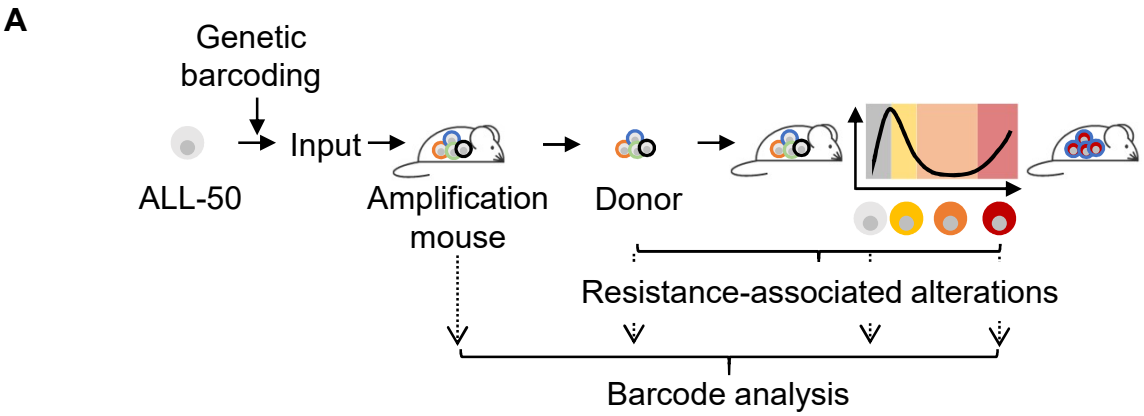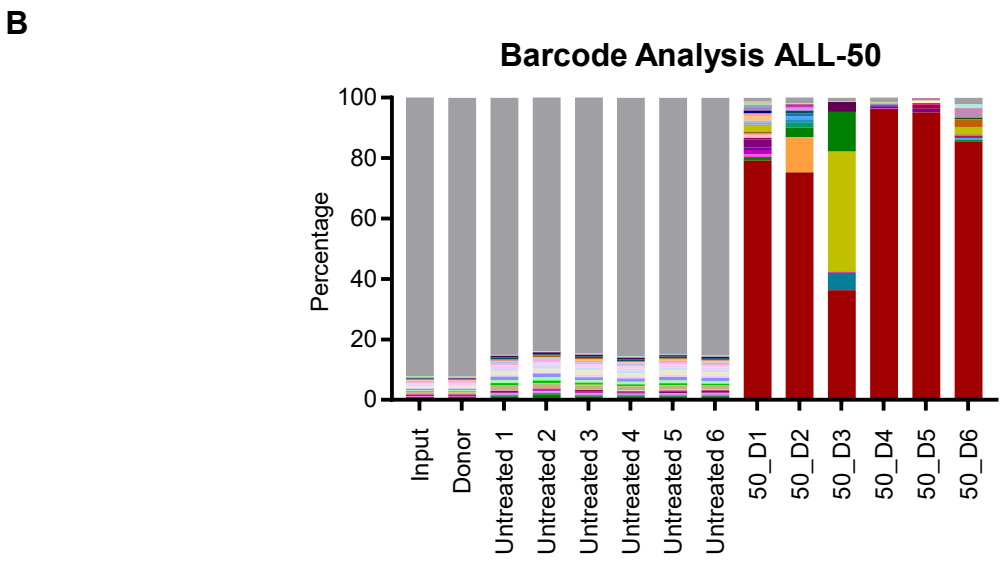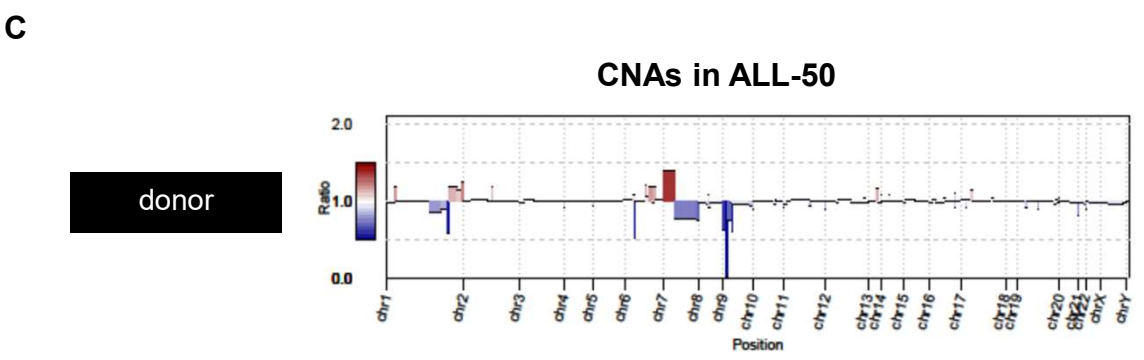

Figure S4

D

Resistance-associated alterations of ALL-50

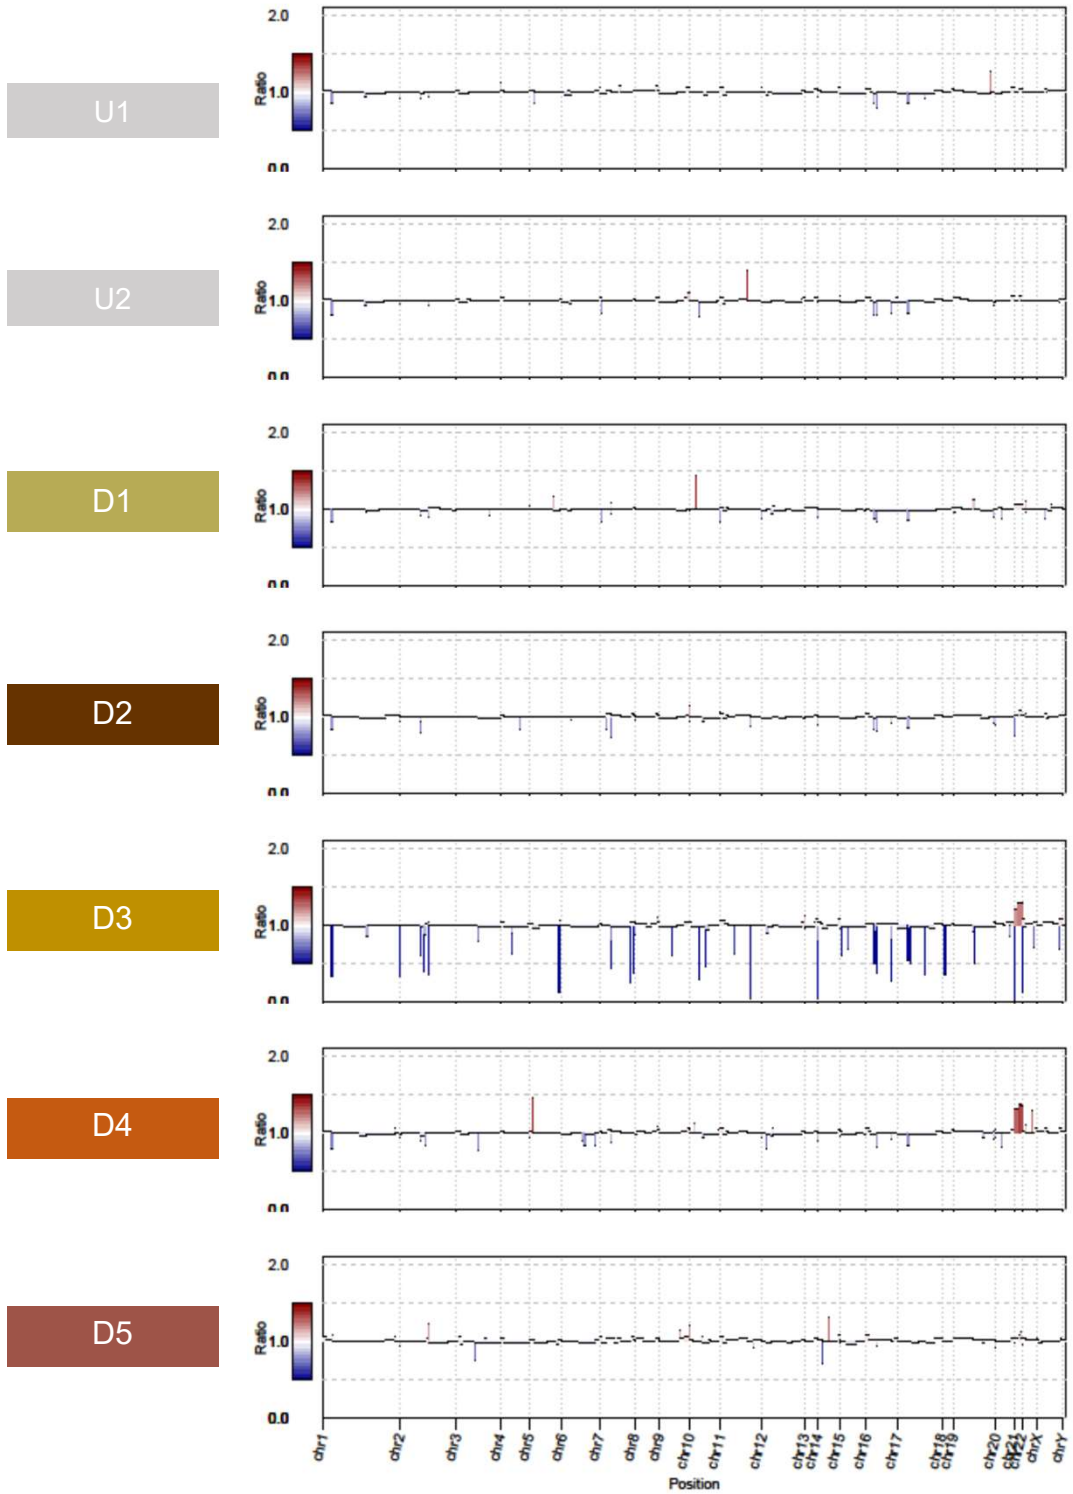

## **Supplementary Figure S4. Genomic characterization of resistant derivatives of ALL-50**

Complementary data to Figure 3.

- A** Experimental procedure. ALL-50 PDX cells were marked so that each clone received an individual barcode. Cells were amplified in mice for 5 weeks; the resulting population of  $5 \times 10^6$  cells contained approximately 750 different barcodes with an average of 700 cells per barcode. Aliquots of identically barcoded cells were re-transplanted into mice and mice were subjected to long-term chemotherapy with results shown in Figure 1J. Mice were sacrificed at defined time points. Barcode and whole exome sequencing was performed.
- B** Barcode analysis. Transduced ALL-50 cells before injection into mice (Input); barcoded ALL-50 cells following amplification (Donor) and cells from six ALL-50U and six ALL-50R mice from experiments described in Figure 1J were analyzed for barcode distribution. Each color represents an individual genetic barcode corresponding to an individual leukemic cell marked before transplantation into the amplification mice, while grey indicates the sum of all barcodes/ clones present at a frequency lower than 0,5%.

### **C-D CNAs of untreated and resistant derivatives of ALL-50.**

CNA of donor ALL-50 PDX cells compared to primary patient leukemia sample (C) and CNA of ALL-50 U1, U2 and ALL-50 D1-D6 cells compared to donor (D) as determined by whole exome sequencing. Losses compared to germ line control are depicted in blue and gains in red. Cut-offs for a copy number segment: min. size 100kb, max. five segments per Chromosome. Data of D6 had to be excluded due to poor sequencing quality.

**Figure S5**

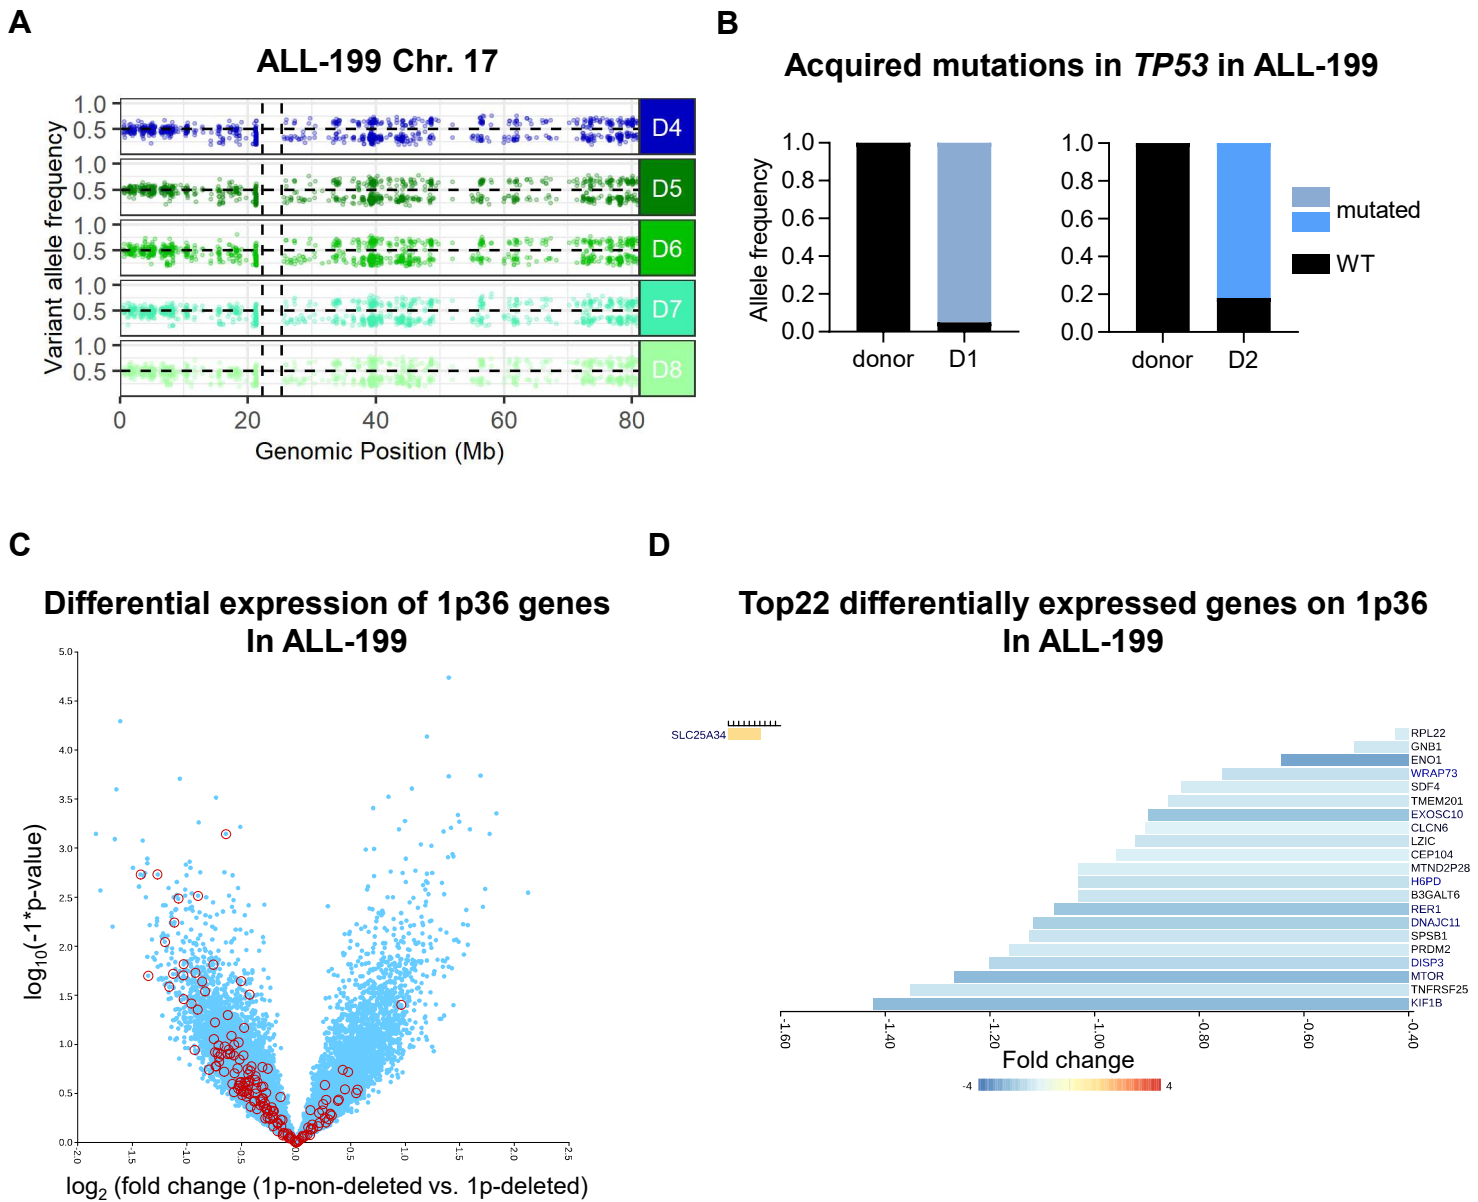

**Supplementary Figure S5. SNV and transcriptome analysis of ALL-199.**

Complementary data to Figure 3E-G.

- A** Remaining data of chr 17 SNV analysis of ALL-199 derivatives not included in Figure 3E are shown.
- B** VAF of the two different acquired SNV in *TP53* in D1 and D2; see also Table S3.
- C** Volcano plot of genes differentially expressed in 1p-non-deleted (ALL-199 D1 and D2) vs 1p-deleted (ALL-199 D4-D8) derivatives. Genes mapping to the 1p36 smallest region of overlapping deletion (SRO) defined in derivatives D4-D8 are marked in red.
- D** Fold bar plot representing the top 22 most differentially expressed 1p36 SRO genes in ALL-199 1p-non-deleted vs 1p deleted derivatives.

Figure S6

**Cancer-relevant, non-synonymous and non-common variants in ALL-50**

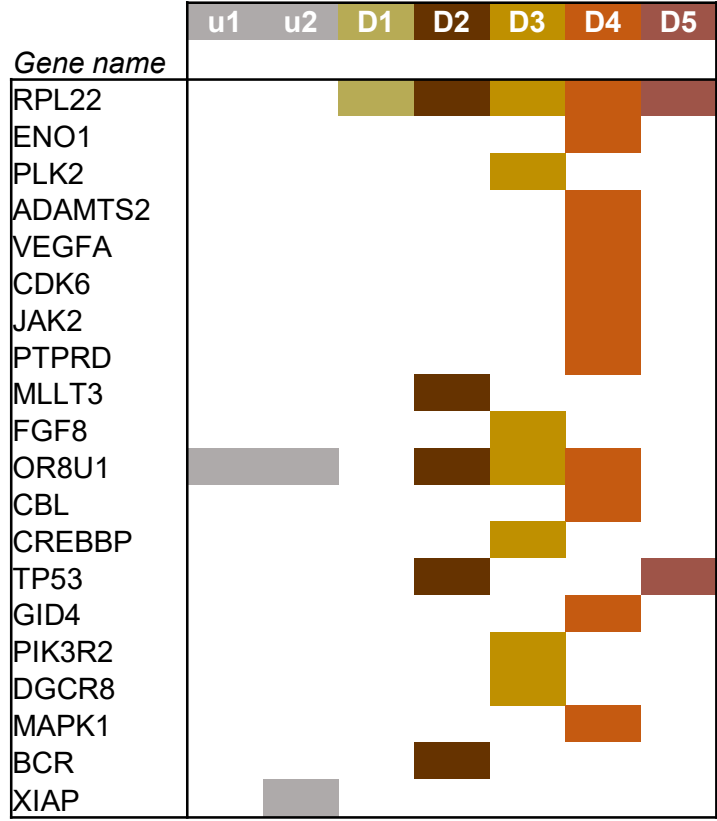

**Supplementary Figure S6. Genomic characterization of resistant derivatives of ALL-50**

Complementary data to Figure 3.

Cancer-relevant, non-synonymous and non-common variants of untreated and resistant ALL-50 PDX cells compared to donor ALL-50 PDX cells as determined by whole exome sequencing.

Color indicates mutation in the respective gene in the respective sample. Mutations were sorted by genomic position. Details on mutations are provided in supplementary Table S5.

Figure S7

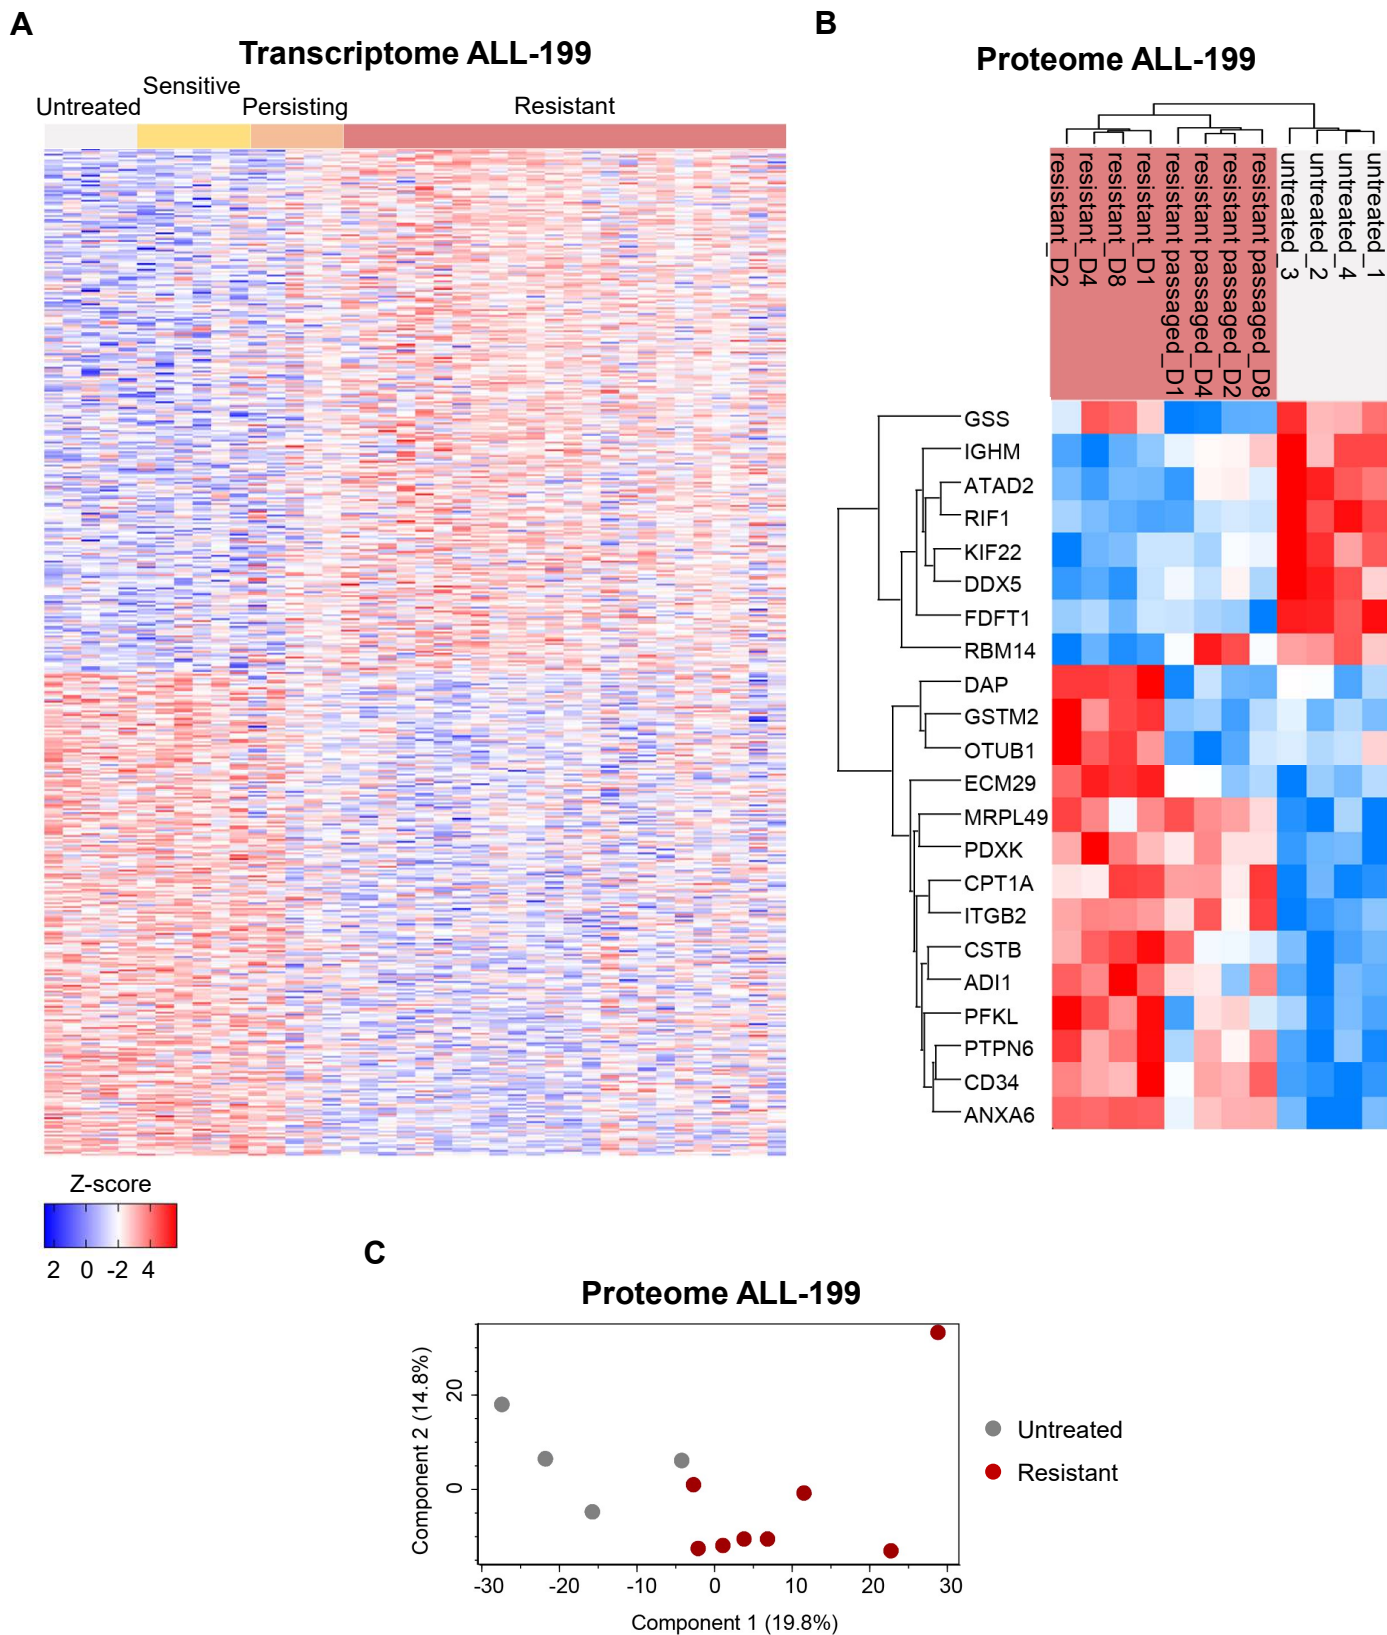

**Supplementary Figure S7. Transcriptomic and proteomic profiling of PDX ALL-199 cells at distinct stages of in vivo treatment.** Complementary data to Figure 3G-I

- A** Experiment described in Figure 3H. Heatmap of 525 differentially expressed genes with  $p < 0.01$  between ALL-199U and ALL-199R is shown. Gene list is provided in Table S4.
- B** Experiment described in Figure 3I. Heatmap of top 22 differentially expressed proteins between ALL-199U and ALL-199R is shown. Protein list is provided in Table S5
- C** Principal component analysis of proteome data. Each dot represents one mouse.

**Figure S8**

**A**

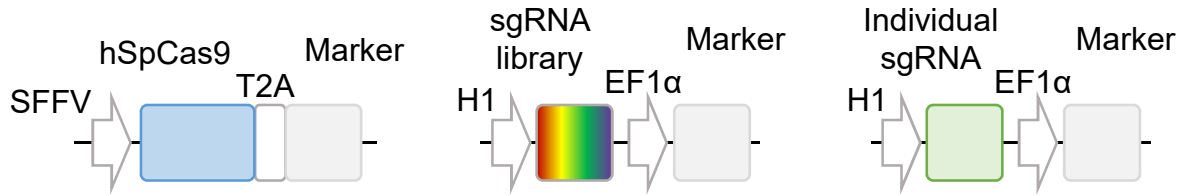

**B**

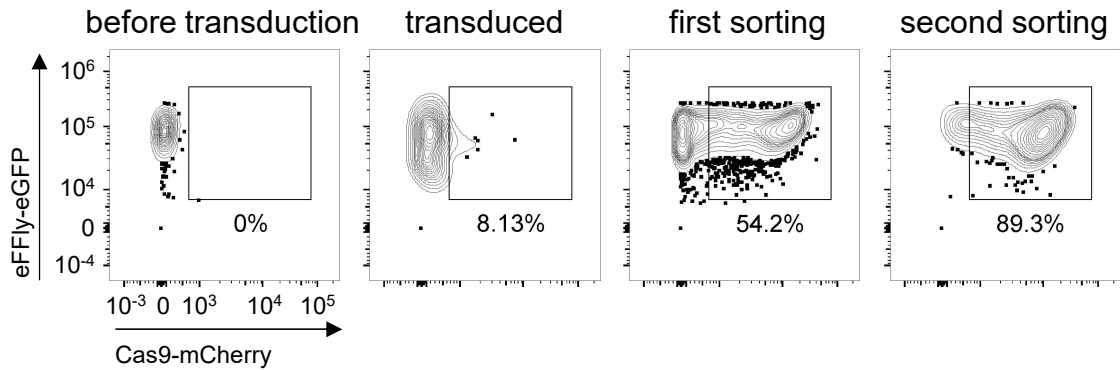

**C**

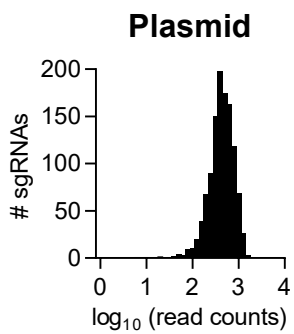

**D**

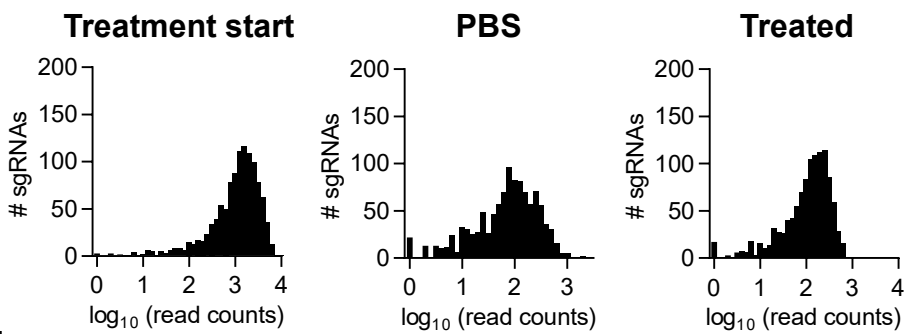

**E**

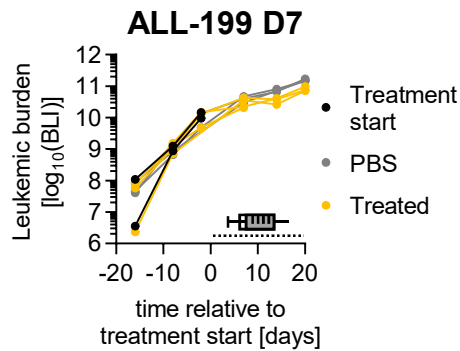

**F**

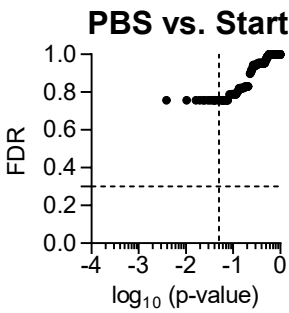

**G**

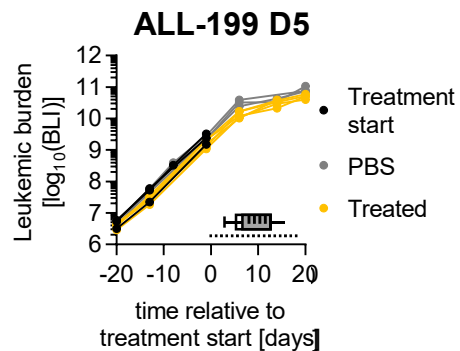

**H**

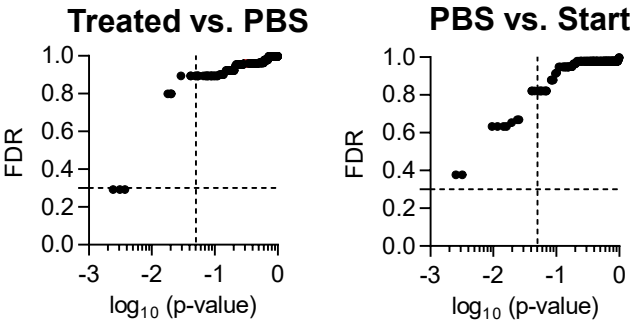

**I**

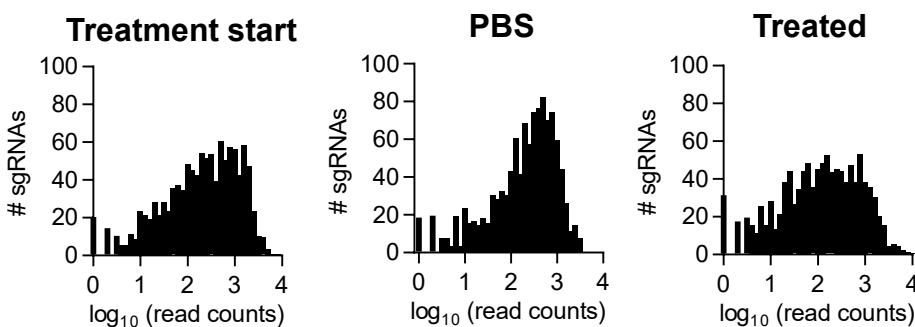



## Supplementary Figure S8: CRISPR/Cas9 screen of BCL2 in resistant ALL-199 derivatives.

Complementary data to Figure 4

- A** Lentiviral constructs. Left: Expression of humanized codon-optimized *S. pyogenes* Cas9 (hSpCas9), linked to a marker (mCherry) via a 2A peptide and under control of the spleen focus-forming virus (SFFV) promoter. Middle and right: Expression of the sgRNA library (middle) or of an individual sgRNA (right) under control of the H1 promoter, linked to a marker (H2Kk-mtagBFP) under control of the EF1 $\alpha$  promoter.
- B** Transduction and enrichment of ALL-199 D7 cells transgenic for the Cas9 construct. Flow cytometric analysis of Cas9 expression in resistant ALL-199 D7 before transduction, on day 7 after transduction and after two enrichment steps by flow cytometry.
- C** Read count distribution of sgRNA library plasmid after cloning as determined by NGS and counting of reads per individual sgRNA (log<sub>10</sub> read counts per sgRNA).
- D** Read count distribution of one representative sample from experiment described in Figure 4A per indicated group and time point. sgRNA locus was amplified from purified PDX gDNA and analyzed by NGS.
- E** Quantification of imaging signals during in vivo engraftment and treatment from experiment described in Figure 4A. One line represents one mouse. Dashed line indicates treatment period.
- F** MAGeCK comparison of PBS vs. start from experiment described in Figure 4A. Plotted is p-value vs. false discovery rate (FDR) for each individual comparison. One dot represents one gene (pooled analysis of 5 sgRNAs per gene). Dashed lines indicate cut-off of  $p = 0.05$  and  $FDR = 0.3$ .
- G** Experiment described in Figure 4A was repeated except that ALL-199 D5 cells were used. Quantification of imaging signals during in vivo engraftment and treatment. One line represents one mouse ( $n=3$  treatment start,  $n=3$  PBS,  $n=5$  treated). Dashed line indicates treatment period.
- H** MAGeCK comparison of treated vs. PBS (upper panel) and PBS vs. start (lower panel) from experiment described in Figure S5G. Plotted is p-value vs. FDR for each individual comparison. One dot represents one gene (pooled analysis of 5 sgRNAs per gene). Dashed lines indicate cut-off of  $p = 0.05$  and  $FDR = 0.3$ . See Table S7 for detailed gene list.
- I** Read count distribution of one representative sample per indicated group from experiment described in Figure S5G. sgRNA locus was amplified from purified PDX gDNA and analyzed by NGS.

**Figure S9**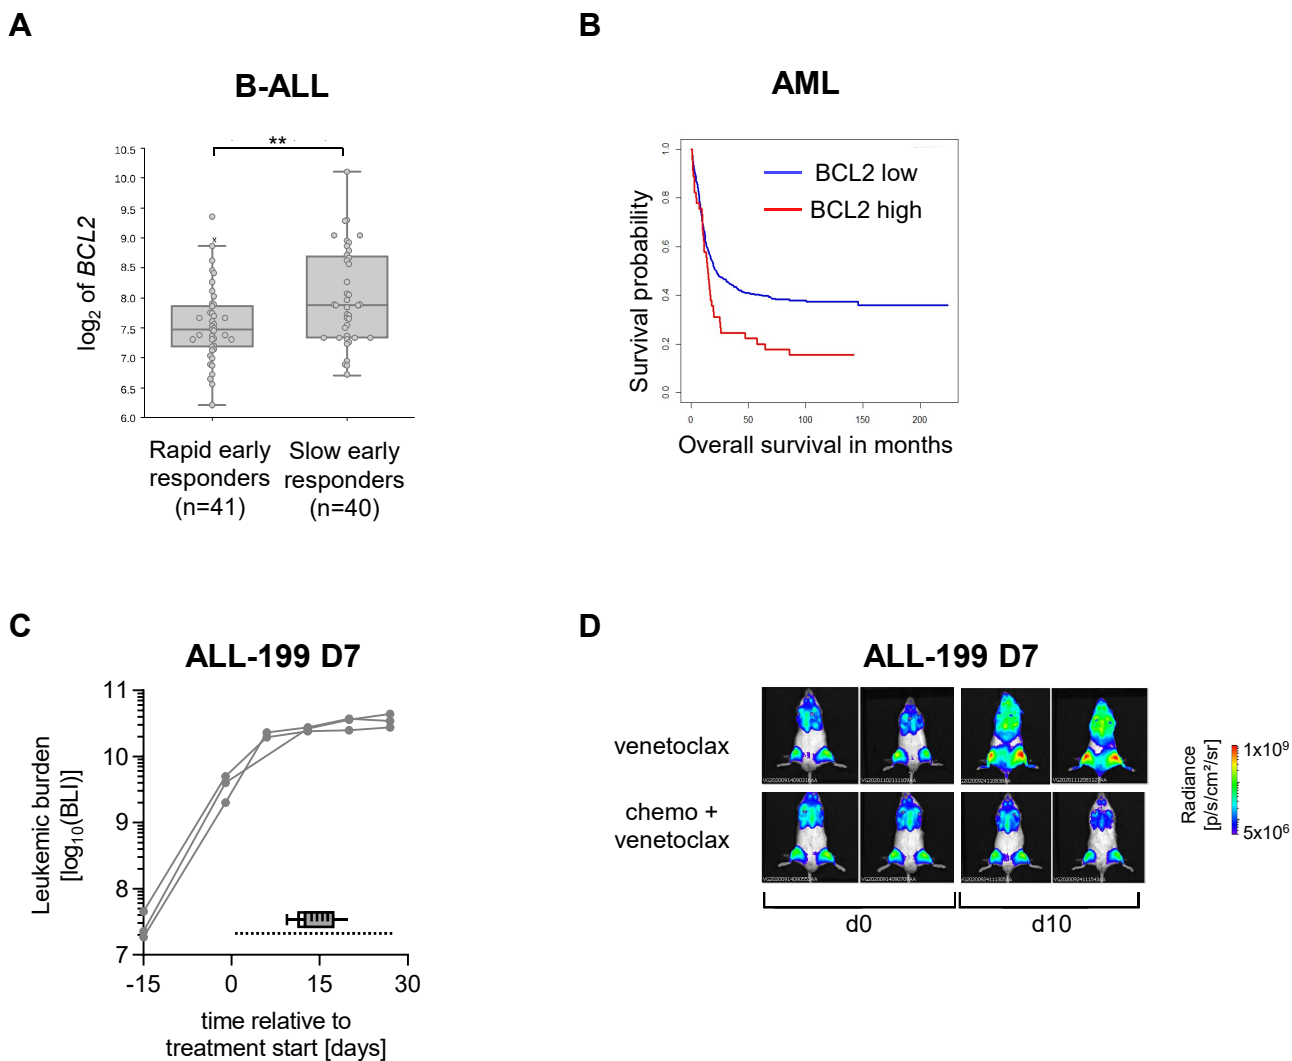

**Supplementary Figure S9: BCL2 inhibition sensitizes resistant derivatives to chemotherapy.**  
Complementary data to Figure 4

- A** Higher BCL2 mRNA expression correlated with slow early response. BCL2 mRNA expression in diagnostic samples of children with high-risk B-precursor ALL, comparing patients with rapid (M1 marrow, <5% blasts, n=41) and slow (M3 marrow, >25% blasts, n=40) early response at day 7 towards a standard four-drug induction treatment ( $p < 0.01$ , t-test, data were re-analyzed from the publicly available dataset GSE7440).
- B** High BCL2 mRNA expression is prognostically unfavorable in AML. Reanalysis of a publicly available microarray dataset consisting of 449 AML patients treated in different trials of the Haemato-Oncology Foundation for Adults in the Netherlands (HOVON). The data were part of a publicly available cohort analyzed by Affymetrix (GSE14468). The association between gene expression and overall survival was analyzed with the Cox proportional hazards model. The expression of the BCL2 gene was significantly associated with poor overall survival (HR = 1.71,  $p = 0.0055$ ). Cut-off for high BCL2 expression was defined by the top 10% of BCL2 expression, all remaining samples were defined as BCL2 low.
- C** Individual mice of control group shown in Figure 4E. One line represents one mouse harbouring ALL-199 D7 cells with non-targeting control sgRNA. Dashed line indicates treatment period.
- D** Imaging picture of two more representative mice engrafted with ALL-199 D7 cells from experiment described in Figure 4GH per group at d0 and d10 of treatment.
